# Supplementary material
Source: Research Square preprint supplement (doi:10.21203/rs.3.rs-8596518/v1)
Supplement: Supplementary file 1 [file 5bc69cc4120ff67103b55462.docx]

Supplement 1.

**eFigure 1.** Flowchart of Participants Included in the Study

**eFigure 2.** Spearman's Correlation Analysis between Husbands and Wives Sleep Characteristics

**eFigure 3.** Kaplan–Meier Survival Curves for Probability of Pregnancy

**eFigure 4.** Kaplan-Meier Survival Curve of Pregnancy Probability after Removing 5% Extreme Values

**eFigure 5.** Interactive Effects of Preconception Sleep and Depressive Symptoms on Fertility Outcomes

**eTable 1.** Sleep Characteristics of Childbearing Age Couples by Pregnancy Status Based on the Follow-Up of 24 Months (n=18 715)

**eTable 2.** The Relationship between Sleep Characteristics of Wives/Husbands and Fecundability

**eTable 3.** The Relationship between Sleep Characteristics of Wives/Husbands and Infertility

**eTable 4.** The Relationship between Sleep Characteristics of Wives/Husbands and Fecundability by Age, Marriage and Weight

**eTable 5.** The Relationship between Sleep Characteristics of Wives/Husbands and Infertility by Age, Marriage and Weight

**eTable 6.** The Interaction Between Sleep Patterns and Depressive Symptom on Fecundability

**eTable 7.** The Interaction Between Sleep Patterns and Depressive Symptom on Infertility

**eTable 8.** The Interaction Between Sleep Patterns and Depressive Symptom on Infertility, Adjusted Model Excluding Couples Undergoing Assisted Reproductive Technology

**eTable 9.** The Relationship between Sleep Characteristics of Wives/Husbands and Infertility, Adjusted Model Excluding Couples Undergoing Assisted Reproductive Technology

**eTable 10.** The Relationship between Sleep Characteristics of Couples and Fecundability

**eTable 11.** The Relationship between Sleep Characteristics of Couples and Infertility

**eTable 12.** The Relationship between Sleep Characteristics of Couple and Fertility Outcomes by Age, Marriage and Weight

**eTable 13.** The Relationship between Sleep Characteristics of Couples and Infertility, Adjusted Model Excluding Couples Undergoing Assisted Reproductive Technology
