# Supplementary material
Source: Research Square preprint supplement (doi:10.21203/rs.3.rs-8596518/v1)
Supplement: Supplementary file 2 [file 9cd57cdccf3272a6f0a79ed8.docx]

**Supplementary Online Content**


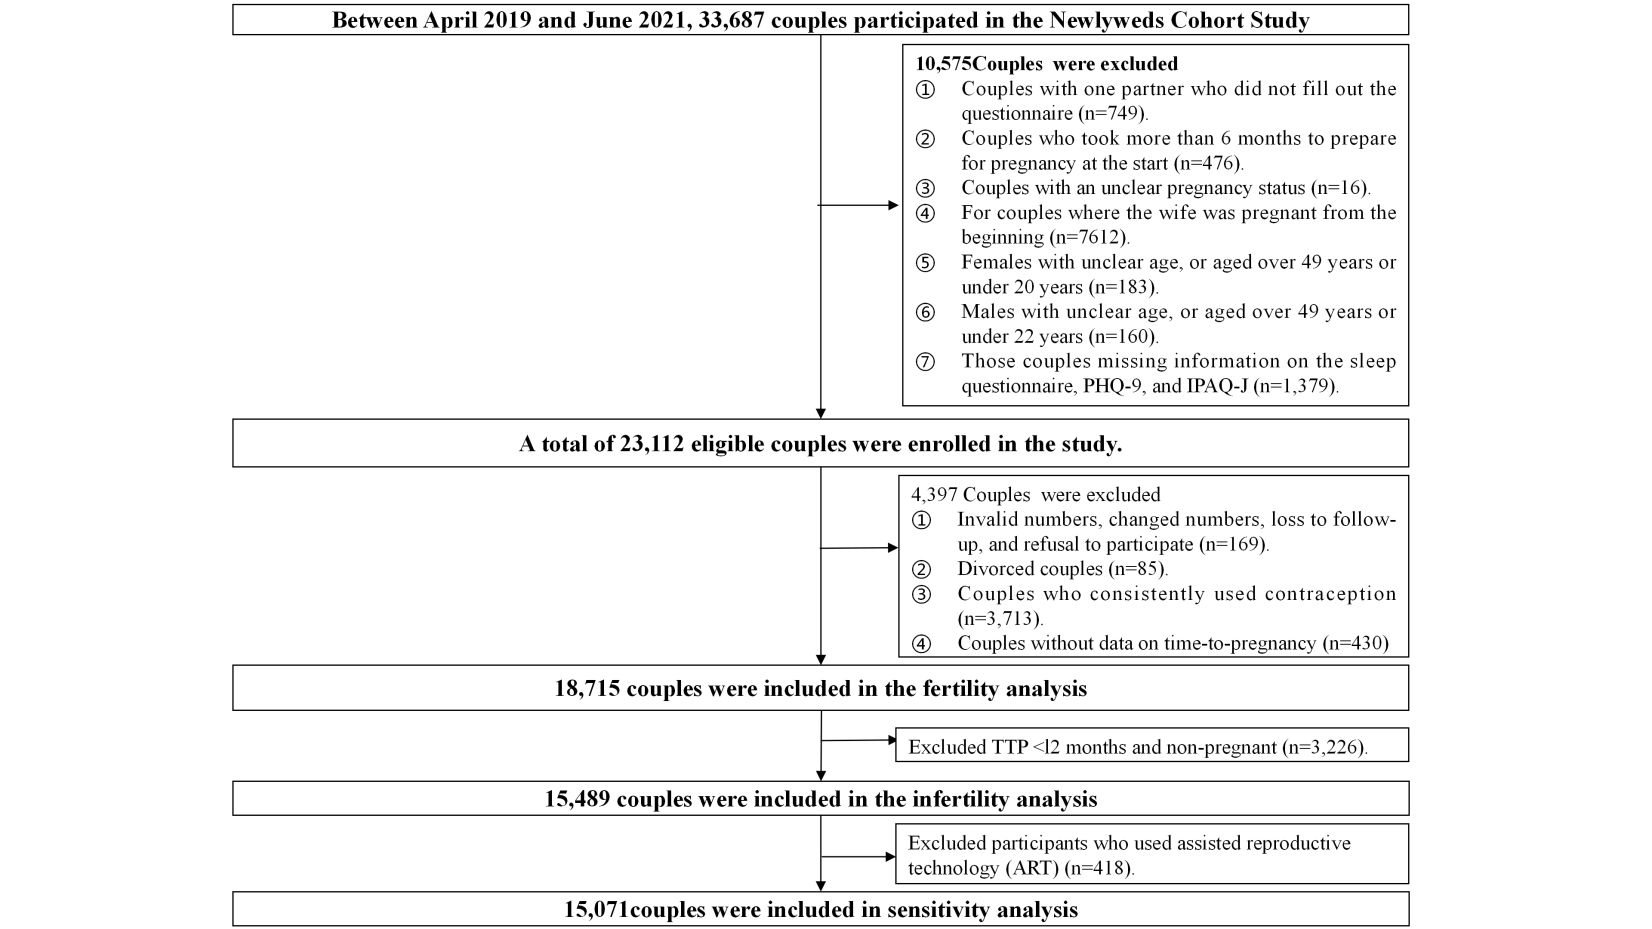


**eFigure 1.** Flowchart of Participants Included in the Study


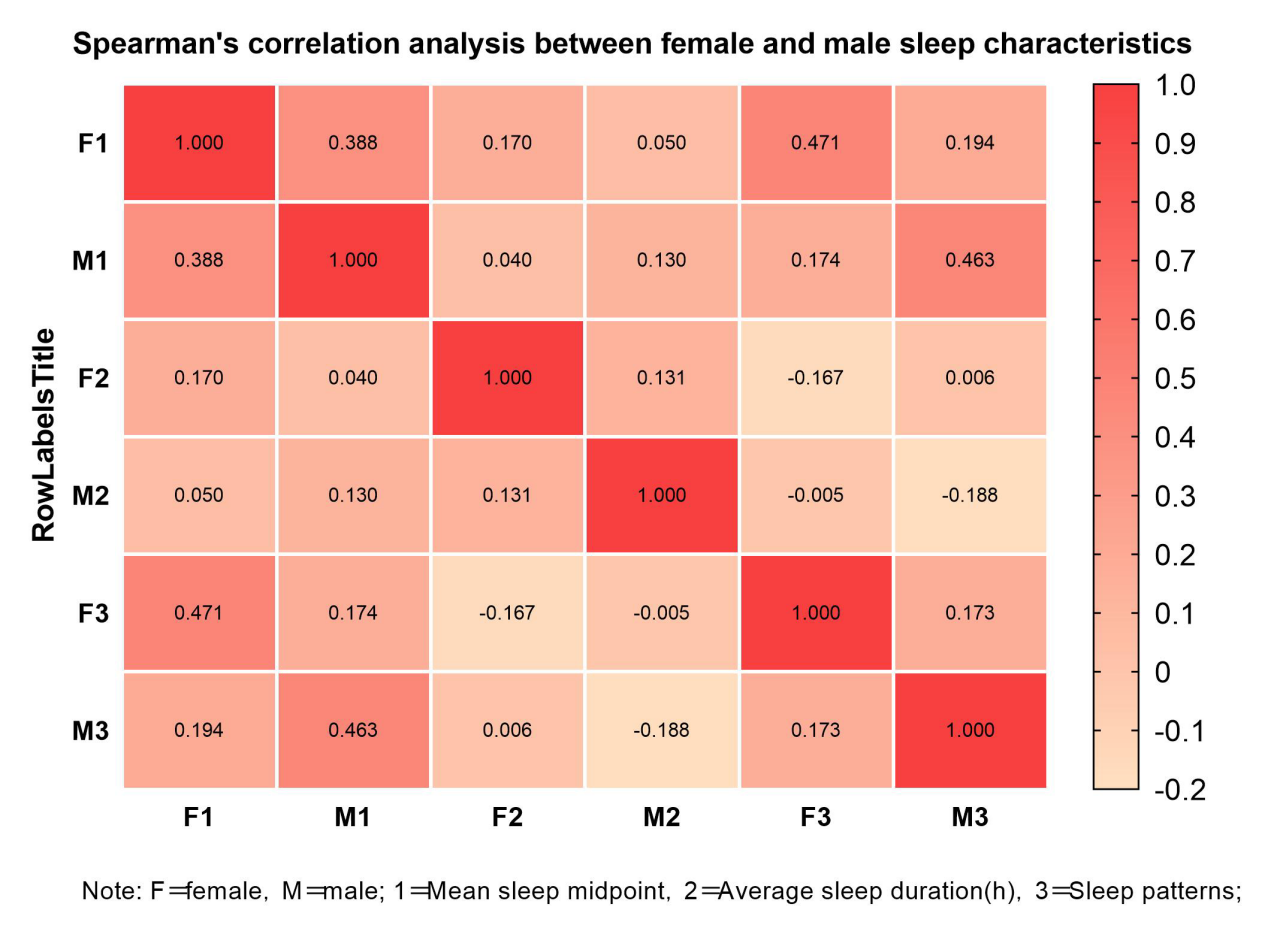
**eFigure 2.** Spearman's Correlation Analysis between Husbands and Wives Sleep Characteristics


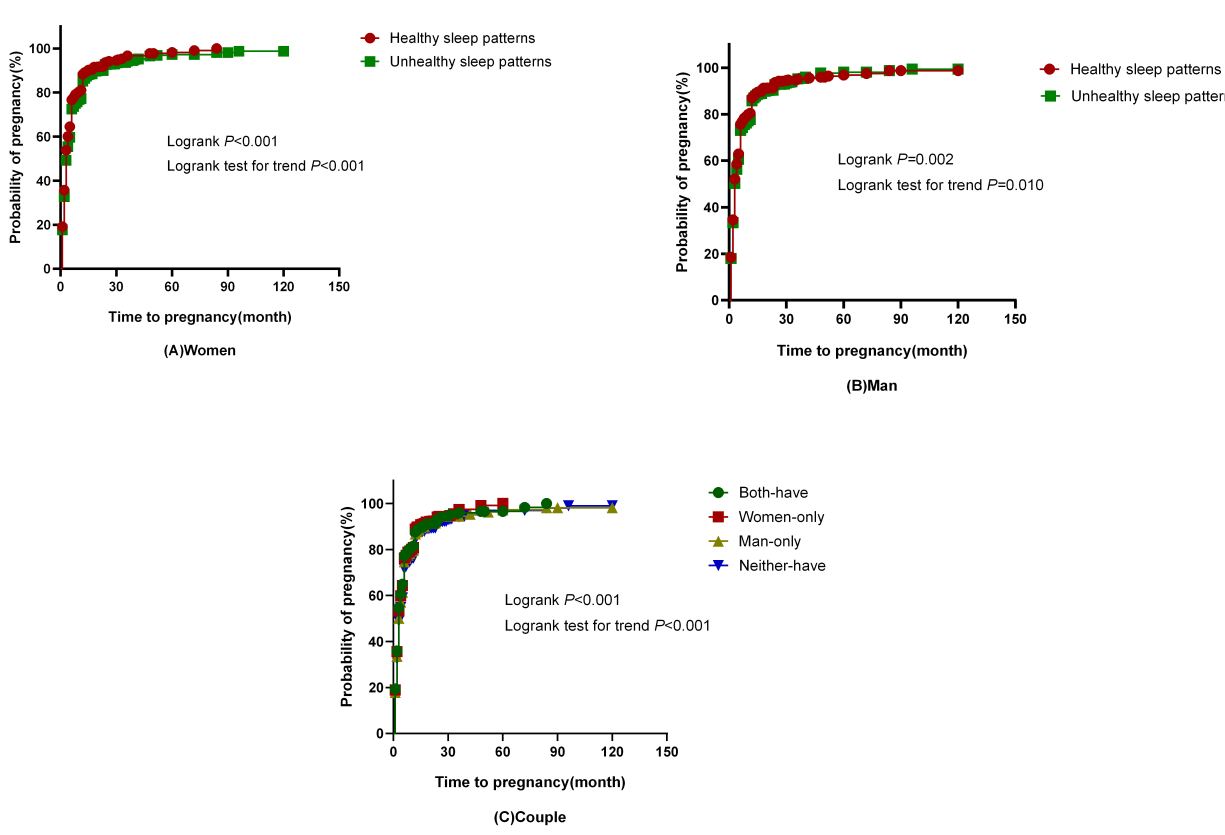


**eFigure 3.** Kaplan–Meier Survival Curves for Probability of Pregnancy.


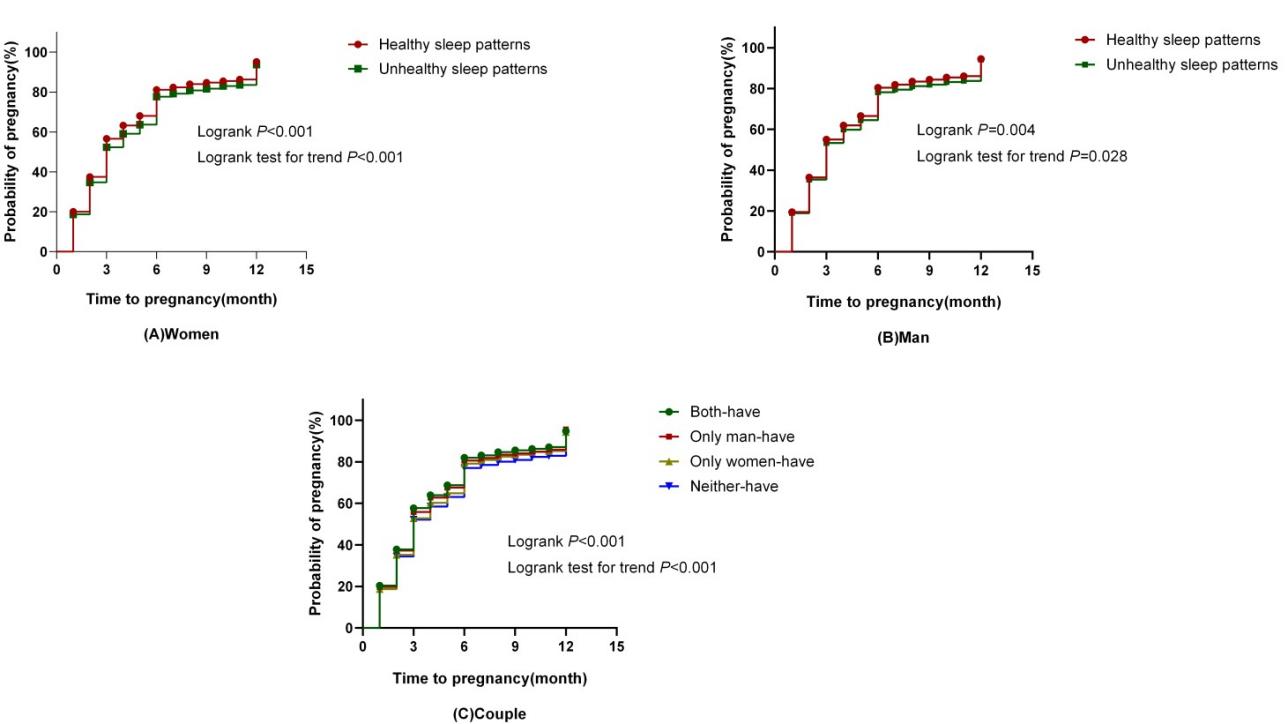


**eFigure 4.** Kaplan-Meier Survival Curve of Pregnancy Probability after Removing 5% Extreme Values


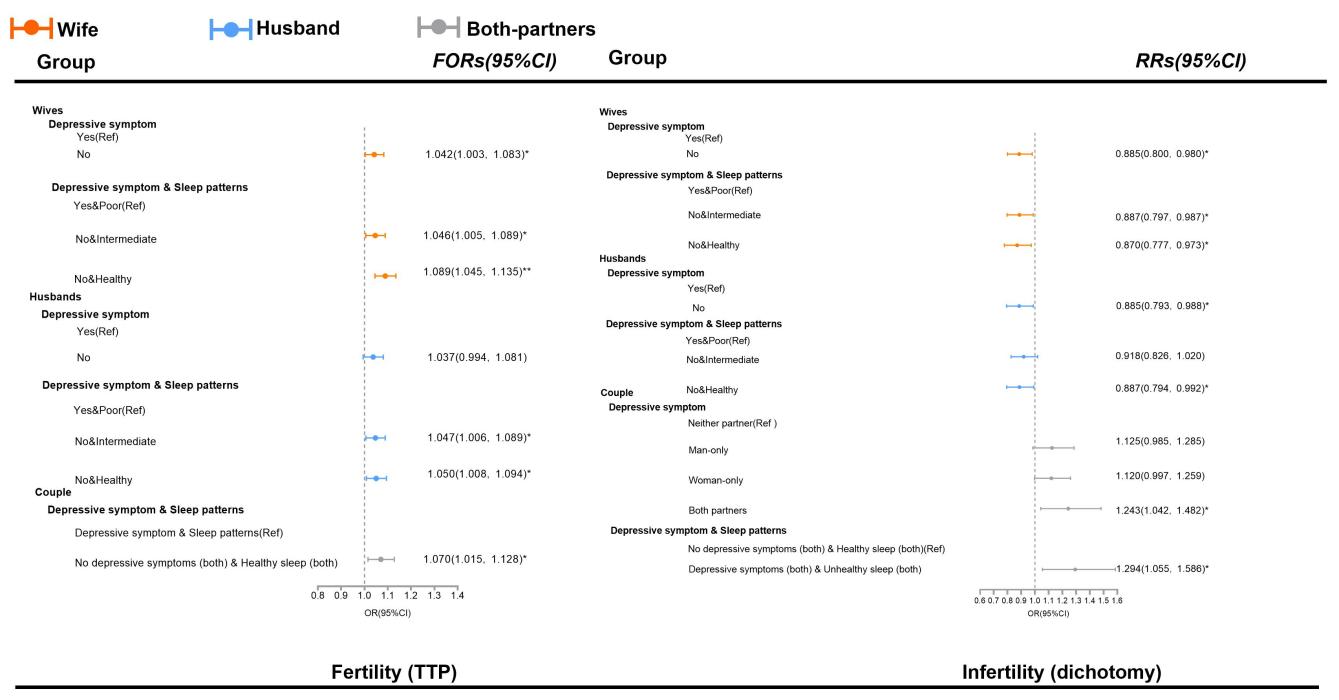


**eFigure 5.** Interactive Effects of Preconception Sleep and Depressive Symptoms on Fertility Outcomes

Adjusted fertility odds ratios (*FORs*; 95% *CIs*) for time to pregnancy (TTP) and adjusted risk ratios (*RRs*; 95% *CIs*) for infertility (defined as TTP >12 months or requiring ART) in relation to depressive symptoms and sleep pattern&depressive symptoms.

*FORs* were estimated from a Cox proportional hazards model (left panel) and represent continuous TTP: a *FOR* <1 indicates shorter TTP (higher fecundability), and a *FOR* >1 indicates longer TTP (lower fecundability). *RRs* were estimated from a logistic regression model (right panel) and indicate dichotomous infertility risk: an *RR* >1 corresponds to elevated risk and an *RR* <1 to reduced risk.

All models were adjusted for regional areas, both partners' ages, BMI, socioeconomic status, marital status, age of sexual debut, unhealthy lifestyle scores, wives' adverse pregnancy history, and live birth history. Statistical significance is indicated as * *P<*0.05, ** *P<*0.01. The horizontal dashed line at 1.0 represents the null association.

| **eTable 1. Sleep Characteristics of Childbearing Age Couples by Pregnancy Status Based on the Follow-Up of 24 Months (n=18 715) a.** | | | | | |
| --- | --- | --- | --- | --- | --- |
| **Sleep characteristics** | **Total**  **(N=18 715)** | **No-pregnant**  **(N=4 163)** | **Pregnant**  **(N=14 552)** | ***χ*2 b** | **φ/V c** |
| **Wives** | | | | | |
| **Average sleep duration(h)** |  |  |  | 11.92** | 0.03** |
| ＜7 | 5154(27.5) | 1211(29.1) | 3943(27.1) |  |  |
| 7～8 | 9391(50.2) | 1992(47.9) | 7399(50.8) |  |  |
| ≥8 | 4170(22.3) | 960(23.1) | 3210(22.1) |  |  |
| **Workday sleep duration(h)** |  |  |  | 9.41** | 0.02** |
| ＜7 | 7176(38.3) | 1656(39.8) | 5520(37.9) |  |  |
| 7～8 | 8505(45.4) | 1805(43.4) | 6700(46.0) |  |  |
| ≥8 | 3034(16.2) | 702(16.9) | 2332(16.0) |  |  |
| **Weekend sleep duration(h)** |  |  |  | 2.90 | 0.01 |
| ＜7 | 2816(15.0) | 661(15.9) | 2155(14.8) |  |  |
| 7～8 | 6049(32.3) | 1334(32.0) | 4715(32.4) |  |  |
| ≥8 | 9850(52.6) | 2168(52.1) | 7682(52.8) |  |  |
| **Mean sleep midpoint** |  |  |  | 24.13** | 0.04** |
| earlier than 2:30 | 3105(16.6) | 687(16.5) | 2418(16.6) |  |  |
| 2:30～3:30 | 10051(53.7) | 2116(50.8) | 7935(54.5) |  |  |
| After 3:30 | 5559(29.7) | 1360(32.7) | 4199(28.9) |  |  |
| **Social jet lag(h)** |  |  |  | 2.14 | -0.01 |
| <1 | 15851(84.7) | 3496(84.0) | 12355(84.9) |  |  |
| ≥1 | 2864(15.3) | 667(16.0) | 2197(15.1) |  |  |
| **Difficulty falling asleep** |  |  |  | 8.71** | -0.02** |
| No | 15215(81.3) | 3319(79.7) | 11896(81.7) |  |  |
| Yes | 3500(18.7) | 844(20.3) | 2656(18.3) |  |  |
| **Sleep quality** |  |  |  | 8.23** | -0.02** |
| Good | 16291(87.0) | 3569(85.7) | 12722(87.4) |  |  |
| Poor | 2424(13.0) | 594(14.3) | 1830(12.6) |  |  |
| **Snoring** |  |  |  | 61.22** | 0.06** |
| Never | 11296(60.4) | 2367(56.9) | 8929(61.4) |  |  |
| Occasionally | 6013(32.1) | 1374(33.0) | 4639(31.9) |  |  |
| Frequently | 1406(7.50) | 422(10.1) | 984(6.80) |  |  |
| **Night awakenings** |  |  |  | 7.86* | 0.02* |
| Never | 5029(26.9) | 1129(27.1) | 3900(26.8) |  |  |
| Occasionally | 12129(64.8) | 2646(63.6) | 9483(65.2) |  |  |
| Frequently | 1557(8.3) | 388(9.3) | 1169(8.0) |  |  |
| **Chronotype** |  |  |  | 27.94** | 0.04** |
| Intermediate types | 6174(33.0) | 1265(30.4) | 4909(33.7) |  |  |
| Early types | 6180(33.0) | 1349(32.4) | 4831(33.2) |  |  |
| Late types | 6361(34.0) | 1549(37.2) | 4812(33.1) |  |  |
| **Sleep characteristics** | **Total**  **(N=18 715)** | **No-pregnant**  **(N=4 163)** | **Pregnant**  **(N=14 552)** | ***χ*2 b** | **φ/V c** |
| **Excessive daytime sleepiness** |  |  |  | 0.06 | 0.00 |
| No | 12262(65.5) | 2734(65.7) | 9528(65.5) |  |  |
| Yes | 6453(34.5) | 1429(34.3) | 5024(34.5) |  |  |
| **Nap** |  |  |  | 10.82** | -0.02** |
| Yes | 11549(61.7) | 2478(59.5) | 9071(62.3) |  |  |
| No | 7166(38.3) | 1685(40.5) | 5481(37.7) |  |  |
| **Sleep problem score** |  |  |  | 57.89** | 0.06** |
| 0 | 2381(12.7) | 453(10.9) | 1928(13.2) |  |  |
| 1 | 4280(22.9) | 866(20.8) | 3414(23.5) |  |  |
| 2 | 4427(23.7) | 959(23.0) | 3468(23.8) |  |  |
| 3 | 3722(19.9) | 876(21.0) | 2846(19.6) |  |  |
| ≥4 | 3905(20.9) | 1009(24.2) | 2896(19.9) |  |  |
| **Sleep patterns** |  |  |  | 52.50** | 0.05** |
| Healthy | 6661(35.6) | 1319(31.7) | 5342(36.7) |  |  |
| Intermediate | 8149(43.5) | 1835(44.1) | 6314(43.4) |  |  |
| Poor | 3905(20.9) | 1009(24.2) | 2896(19.9) |  |  |
| **Husbands** | | | | | |
| **Average sleep duration(h)** |  |  |  | 11.83** | 0.03** |
| ＜7 | 5547(29.6) | 1317(31.6) | 4230(29.1) |  |  |
| 7～8 | 9586(51.2) | 2045(49.1) | 7541(51.8) |  |  |
| ≥8 | 3582(19.1) | 801(19.2) | 2781(19.1) |  |  |
| **Workday sleep duration(h)** |  |  |  | 9.81** | 0.02** |
| ＜7 | 7572(40.5) | 1764(42.4) | 5808(39.9) |  |  |
| 7～8 | 8583(45.9) | 1824(43.8) | 6759(46.4) |  |  |
| ≥8 | 2560(13.7) | 575(13.8) | 1985(13.6) |  |  |
| **Weekend sleep duration(h)** |  |  |  | 20.73** | 0.03** |
| ＜7 | 2772(14.8) | 694(16.7) | 2078(14.3) |  |  |
| 7～8 | 6464(34.5) | 1470(35.3) | 4994(34.3) |  |  |
| ≥8 | 9479(50.6) | 1999(48.0) | 7480(51.4) |  |  |
| **Mean sleep midpoint** |  |  |  | 7.12* | 0.02* |
| earlier than 2:30 | 3380(18.1) | 781(18.8) | 2599(17.9) |  |  |
| 2:30～3:30 | 9593(51.3) | 2058(49.4) | 7535(51.8) |  |  |
| After 3:30 | 5742(30.7) | 1324(31.8) | 4418(30.4) |  |  |
| **Social jet lag(h)** |  |  |  | 1.30 | -0.01 |
| <1 | 15959(85.3) | 3527(84.7) | 12432(85.4) |  |  |
| ≥1 | 2756(14.7) | 636(15.3) | 2120(14.6) |  |  |
| **Difficulty falling asleep** |  |  |  | 12.07** | -0.03** |
| No | 15710(83.9) | 3422(82.2) | 12288(84.4) |  |  |
| Yes | 3005(16.1) | 741(17.8) | 2264(15.6) |  |  |
| **Sleep quality** |  |  |  | 10.39** | -0.03** |
| Good | 17044(91.1) | 3739(89.8) | 13305(91.4) |  |  |
| **Sleep characteristics** | **Total**  **(N=18 715)** | **No-pregnant**  **(N=4 163)** | **Pregnant**  **(N=14 552)** | ***χ*2 b** | **φ/V c** |
| Poor | 1671(8.90) | 424(10.2) | 1247(8.60) |  |  |
| **Snoring** |  |  |  | 8.21* | 0.02* |
| Never | 5449(29.1) | 1155(27.7) | 4294(29.5) |  |  |
| Occasionally | 7771(41.5) | 1719(41.3) | 6052(41.6) |  |  |
| Frequently | 5495(29.4) | 1289(31.0) | 4206(28.9) |  |  |
| **Night awakenings** |  |  |  | 0.42 | 0.01 |
| Never | 6664(35.6) | 1465(35.2) | 5199(35.7) |  |  |
| Occasionally | 11245(60.1) | 2516(60.4) | 8729(60.0) |  |  |
| Frequently | 806(4.30) | 182(4.40) | 624(4.30) |  |  |
| **Chronotype** |  |  |  | 2.35 | 0.01 |
| Intermediate types | 6520(34.8) | 1410(33.9) | 5110(35.1) |  |  |
| Early types | 6129(32.7) | 1375(33.0) | 4754(32.7) |  |  |
| Late types | 6066(32.4) | 1378(33.1) | 4688(32.2) |  |  |
| **Excessive daytime sleepiness** |  |  |  | 0.16 | 0.00 |
| No | 13405(71.6) | 2992(71.9) | 10413(71.6) |  |  |
| Yes | 5310(28.4) | 1171(28.1) | 4139(28.4) |  |  |
| **Nap** |  |  |  | 0.90 | -0.01 |
| Yes | 12079(64.5) | 2661(63.9) | 9418(64.7) |  |  |
| No | 6636(35.5) | 1502(36.1) | 5134(35.3) |  |  |
| **Sleep problem score** |  |  |  | 22.12** | 0.03** |
| 0 | 2215(11.8) | 441(10.6) | 1774(12.2) |  |  |
| 1 | 4255(22.7) | 910(21.9) | 3345(23.0) |  |  |
| 2 | 4449(23.8) | 997(23.9) | 3452(23.7) |  |  |
| 3 | 3768(20.1) | 824(19.8) | 2944(20.2) |  |  |
| ≥4 | 4028(21.5) | 991(23.8) | 3037(20.9) |  |  |
| **Sleep patterns** |  |  |  | 19.94** | 0.03** |
| Healthy | 6470(34.6) | 1351(32.5) | 5119(35.2) |  |  |
| Intermediate | 8217(43.9) | 1821(43.7) | 6396(44.0) |  |  |
| Poor | 4028(21.5) | 991(23.8) | 3037(20.9) |  |  |
| **Couple** | | | | | |
| **sleep deficiency** |  |  |  | 19.10** | 0.03** |
| Neither partner | 9852(52.6) | 2114(50.8) | 7738(53.2) |  |  |
| Man-only | 3709(19.8) | 838(20.1) | 2871(19.7) |  |  |
| Woman-only | 3314(17.7) | 732(17.6) | 2582(17.7) |  |  |
| Both partners | 1840(9.80) | 479(11.5) | 1361(9.40) |  |  |
| **Sleep midpoint after 3:30** |  |  |  | 22.86** | 0.04** |
| Neither partner | 10187(54.4) | 2165(52.0) | 8022(55.1) |  |  |
| Man-only | 2969(15.9) | 638(15.3) | 2331(16.0) |  |  |
| Woman-only | 2786(14.9) | 674(16.2) | 2112(14.5) |  |  |
| Both partners | 2773(14.8) | 686(16.5) | 2087(14.3) |  |  |
| **Sleep characteristics** | **Total**  **(N=18 715)** | **No-pregnant**  **(N=4 163)** | **Pregnant**  **(N=14 552)** | ***χ2 b*** | **φ/V c** |
| **Social jet lag** |  |  |  | 3.21 | 0.01 |
| Neither partner | 13686(73.1) | 3002(72.1) | 10684(73.4) |  |  |
| Man-only | 2165(11.6) | 494(11.9) | 1671(11.5) |  |  |
| Woman-only | 2273(12.1) | 525(12.6) | 1748(12.0) |  |  |
| Both partners | 591(3.20) | 142(3.40) | 449(3.10) |  |  |
| **Difficulty falling asleep** |  |  |  | 20.28** | 0.03** |
| Neither partner | 12905(69.0) | 2755(66.2) | 10150(69.7) |  |  |
| Man-only | 2310(12.3) | 564(13.5) | 1746(12.0) |  |  |
| Woman-only | 2805(15.0) | 667(16.0) | 2138(14.7) |  |  |
| Both partners | 695(3.7) | 177(4.3) | 518(3.6) |  |  |
| **Poor sleep quality** |  |  |  | 19.07** | 0.03** |
| Neither partner | 14936(79.8) | 3224(77.4) | 11712(80.5) |  |  |
| Man-only | 1355(7.2) | 345(8.3) | 1010(6.9) |  |  |
| Woman-only | 2108(11.3) | 515(12.4) | 1593(10.9) |  |  |
| Both partners | 316(1.7) | 79(1.9) | 237(1.6) |  |  |
| **Frequently snoring** |  |  |  | 63.34** | 0.06** |
| Neither partner | 12357(66.0) | 2637(63.3) | 9720(66.8) |  |  |
| Man-only | 4952(26.5) | 1104(26.5) | 3848(26.4) |  |  |
| Woman-only | 863(4.6) | 237(5.7) | 626(4.3) |  |  |
| Both partners | 543(2.9) | 185(4.4) | 358(2.5) |  |  |
| **Frequently night awakenings** |  |  |  | 7.08 | 0.02 |
| Neither partner | 16475(88.0) | 3623(87.0) | 12852(88.3) |  |  |
| Man-only | 683(3.6) | 152(3.7) | 531(3.6) |  |  |
| Woman-only | 1434(7.7) | 358(8.6) | 1076(7.4) |  |  |
| Both partners | 123(0.7) | 30(0.7) | 93(0.6) |  |  |
| **Chronotype(Late types)** |  |  |  | 25.02** | 0.04** |
| Neither partner | 9165(49.0) | 1931(46.4) | 7234(49.7) |  |  |
| Man-only | 3189(17.0) | 683(16.4) | 2506(17.2) |  |  |
| Woman-only | 3484(18.6) | 854(20.5) | 2630(18.1) |  |  |
| Both partners | 2877(15.4) | 695(16.7) | 2182(15.0) |  |  |
| **Excessive daytime sleepiness** |  |  |  | 0.74 | 0.01 |
| Neither partner | 9050(48.4) | 2033(48.8) | 7017(48.2) |  |  |
| Man-only | 3212(17.2) | 701(16.8) | 2511(17.3) |  |  |
| Woman-only | 4355(23.3) | 959(23.0) | 3396(23.3) |  |  |
| Both partners | 2098(11.2) | 470(11.3) | 1628(11.2) |  |  |
| **No nap** |  |  |  | 13.90** | 0.03** |
| Neither partner | 8169(43.6) | 1769(42.5) | 6400(44.0) |  |  |
| Man-only | 3380(18.1) | 709(17.0) | 2671(18.4) |  |  |
| Woman-only | 3910(20.9) | 892(21.4) | 3018(20.7) |  |  |
| Both partners | 3256(17.4) | 793(19.0) | 2463(16.9) |  |  |
| **Sleep characteristics** | **Total**  **(N=18 715)** | **No-pregnant**  **(N=4 163)** | **Pregnant**  **(N=14 552)** | ***χ*2 b** | **φ/V c** |
| **Sleep problem score**≥4 |  |  |  | 48.37** | 0.05** |
| Neither partner | 11985(64.0) | 2492(59.9) | 9493(65.2) |  |  |
| Man-only | 2825(15.1) | 662(15.9) | 2163(14.9) |  |  |
| Woman-only | 2702(14.4) | 680(16.3) | 2022(13.9) |  |  |
| Both partners | 1203(6.4) | 329(7.9) | 874(6.0) |  |  |
| **Healthy Sleep patterns** |  |  |  |  |  |
| Neither partner | 8450(45.2) | 2048(49.2) | 6402(44.0) | 42.98** | 0.05** |
| Man-only | 3604(19.3) | 796(19.1) | 2808(19.3) |  |  |
| Woman-only | 3795(20.3) | 764(18.4) | 3031(20.8) |  |  |
| Both partners | 2866(15.3) | 555(13.3) | 2311(15.9) |  |  |
| 1. The participants were couples who underwent premarital examinations between April 2019 and June 2021.The final analysis comprised 18,715 couples who had been trying to conceive for no more than 6 months at enrollment and were followed up for 24 months or until pregnancy outcomes were known. 2. Included the central, northern, and southern parts of Anhui Province 3. SES was categorized into low, medium, and high levels based on a composite score derived from education, income, and employment status. 4. * *P*＜0.05, ** *P*＜0.01. Pregnant and non-pregnant groups were compared using the Chi-square test for the categorical variables. 5. The phi coefficient and Cramer's V quantify the strength of association between categorical variables, with phi applied exclusively to 2×2 contingency tables and Cramer's V suitable for tables of any dimension. | | | | | |

| **eTable 2. The Relationship between Sleep Characteristics of Wives/Husbands and Fecundability** | | | | | | |
| --- | --- | --- | --- | --- | --- | --- |
| **Sleep characteristics** | **Wives** | | | **Husbands** | | |
| **Unadjusted Model**  ***FOR*(95% *CI*)** | **Model 1a**  ***FOR*(95% *CI*)** | **Model 2b**  ***FOR*(95% *CI*)** | **Unadjusted**  ***FOR*(95% *CI*)** | **Model 1a**  ***FOR*(95% *CI*)** | **Model 2b**  ***FOR*(95% *CI*)** |
| **Average sleep duration(h)** |  |  |  |  |  |  |
| 7～8 | 1.000 | 1.000 | 1.000 | 1.000 | 1.000 | 1.000 |
| ＜7 | 0.959(0.922，0.997)* | 0.991(0.953，1.030) | 0.994(0.956，1.034) | 0.971(0.935，1.008) | 1.003(0.966，1.042) | 1.006(0.969，1.045) |
| ≥8 | 0.946(0.908，0.987)** | 0.949(0.910，0.989)* | 0.948(0.909，0.988)* | 0.984(0.942，1.028) | 0.986(0.944，1.030) | 0.985(0.943，1.029) |
| **Workday sleep duration(h)** |  |  |  |  |  |  |
| 7～8 | 1.000 | 1.000 | 1.000 | 1.000 | 1.000 | 1.000 |
| ＜7 | 0.963(0.929，0.998)* | 0.988(0.954，1.024) | 0.992(0.957，1.028) | 0.97(0.937，1.005) | 0.993(0.959，1.029) | 0.997(0.962，1.033) |
| ≥8 | 0.939(0.896，0.984)** | 0.951(0.907，0.998)* | 0.951(0.907，0.997)* | 0.974(0.926，1.024) | 0.978(0.930，1.029) | 0.978(0.930，1.028) |
| **Weekend sleep duration(h)** |  |  |  |  |  |  |
| 7～8 | 1.000 | 1.000 | 1.000 | 1.000 | 1.000 | 1.000 |
| ＜7 | 0.962(0.914，1.012) | 0.999(0.949，1.052) | 1.002(0.952，1.054) | 0.967(0.919，1.018) | 0.997(0.947，1.049) | 0.999(0.949，1.052) |
| ≥8 | 0.987(0.952，1.024) | 0.971(0.937，1.007) | 0.971(0.936，1.007) | 1.035(0.998，1.072) | 1.016(0.980，1.053) | 1.016(0.980，1.054) |
| **Mean sleep midpoint** |  |  |  |  |  |  |
| 2:30～3:30 | 1.000 | 1.000 | 1.000 | 1.000 | 1.000 | 1.000 |
| earlier than 2:30 | 0.922(0.881，0.965)** | 0.985(0.941，1.032) | 0.985(0.940，1.032) | 0.907(0.867，0.948)** | 0.976(0.932，1.021) | 0.975(0.932，1.021) |
| After 3:30 | 0.906(0.873，0.941)** | 0.916(0.882，0.952)** | 0.918(0.884，0.954)** | 0.975(0.939，1.012) | 0.976(0.940，1.013) | 0.978(0.942，1.016) |
| **Social jet lag(h)** |  |  |  |  |  |  |
| <1 | 1.000 | 1.000 | 1.000 | 1.000 | 1.000 | 1.000 |
| ≥1 | 0.994(0.950，1.040) | 0.992(0.948，1.038) | 0.993(0.949，1.040) | 0.982(0.938，1.028) | 1.004(0.958，1.051) | 1.006(0.961，1.054) |
| **Difficulty falling asleep** |  |  |  |  |  |  |
| No | 1.000 | 1.000 | 1.000 | 1.000 | 1.000 | 1.000 |
| Yes | 0.929(0.891，0.969)** | 0.958(0.918，0.999)* | 0.961(0.921，1.004) | 0.911(0.871，0.952)** | 0.947(0.906，0.991)* | 0.951(0.909，0.995)* |
| **Sleep quality** |  |  |  |  |  |  |
| Good | 1.000 | 1.000 | 1.000 | 1.000 | 1.000 | 1.000 |
| Poor | 0.945(0.899，0.992)* | 0.978(0.930，1.027) | 0.990(0.940，1.041) | 0.948(0.895，1.005) | 0.965(0.911，1.023) | 0.974(0.918，1.034) |
| **Snoring** |  |  |  |  |  |  |
| Never | 1.000 | 1.000 | 1.000 | 1.000 | 1.000 | 1.000 |
| Occasionally | 0.941(0.908，0.975)** | 0.963(0.930，0.998)* | 0.965(0.931，1.000) | 0.976(0.939，1.015) | 0.990(0.951，1.030) | 0.991(0.953，1.031) |
| Frequently | 0.796(0.745，0.850)** | 0.875(0.818，0.935)** | 0.877(0.820，0.938)** | 0.944(0.904，0.985)** | 0.989(0.946，1.033) | 0.992(0.949，1.037) |
| **Sleep characteristics** | **Wives** | | | **Husbands** | | |
| **Unadjusted Model**  ***FOR*(95% *CI*)** | **Model 1a**  ***FOR*(95% *CI*)** | **Model 2b**  ***FOR*(95% *CI*)** | **Unadjusted**  ***FOR*(95% *CI*)** | **Model 1a**  ***FOR*(95% *CI*)** | **Model 2b**  ***FOR*(95% *CI*)** |
| **Night awakenings** |  |  |  |  |  |  |
| Never | 1.000 | 1.000 | 1.000 | 1.000 | 1.000 | 1.000 |
| Occasionally | 1.002(0.965，1.040) | 1.001(0.964，1.039) | 1.006(0.969，1.045) | 0.987(0.954，1.022) | 1.002(0.968，1.037) | 1.005(0.971，1.041) |
| Frequently | 0.908(0.851，0.969)** | 0.963(0.902，1.029) | 0.971(0.909，1.038) | 0.938(0.864，1.02) | 1.000(0.920，1.087) | 1.007(0.926，1.095) |
| **Chronotype** |  |  |  |  |  |  |
| Intermediate types | 1.000 | 1.000 | 1.000 | 1.000 | 1.000 | 1.000 |
| Early types | 0.939(0.903，0.977)** | 0.980(0.941，1.020) | 0.980(0.941，1.020) | 0.954(0.917，0.992)* | 0.989(0.951，1.030) | 0.989(0.950，1.029) |
| Late types | 0.917(0.881，0.954)** | 0.923(0.887，0.961)** | 0.924(0.888，0.962)** | 0.988(0.949，1.028) | 0.982(0.944，1.022) | 0.984(0.946，1.024) |
| **Excessive daytime sleepiness** |  |  |  |  |  |  |
| No | 1.000 | 1.000 | 1.000 | 1.000 | 1.000 | 1.000 |
| Yes | 0.989(0.956，1.024) | 0.980(0.947，1.014) | 0.987(0.953，1.023) | 1.011(0.975，1.048) | 1.015(0.979，1.052) | 1.024(0.986，1.062) |
| **Nap** |  |  |  |  |  |  |
| Yes | 1.000 | 1.000 | 1.000 | 1.000 | 1.000 | 1.000 |
| No | 0.926(0.895，0.957)** | 0.951(0.919，0.985)** | 0.952(0.920，0.985)** | 0.959(0.927，0.992)* | 0.969(0.936，1.003) | 0.970(0.937，1.004) |
| **Sleep problem score** |  |  |  |  |  |  |
| 0 | 1.000 | 1.000 | 1.000 | 1.000 | 1.000 | 1.000 |
| 1 | 0.963(0.911，1.018) | 0.978(0.925，1.034) | 0.980(0.926，1.036) | 0.979(0.924，1.037) | 0.984(0.929，1.042) | 0.986(0.930，1.044) |
| 2 | 0.938(0.887，0.992)* | 0.960(0.908，1.016) | 0.963(0.910，1.019) | 0.957(0.904，1.014) | 0.966(0.912，1.023) | 0.969(0.915，1.027) |
| 3 | 0.896(0.845，0.949)** | 0.915(0.863，0.971)** | 0.919(0.867，0.975)** | 0.963(0.908，1.022) | 0.976(0.920，1.036) | 0.982(0.925，1.042) |
| ≥4 | 0.840(0.793，0.890)** | 0.880(0.829，0.935)** | 0.886(0.834，0.942)** | 0.913(0.861，0.969)** | 0.938(0.884，0.996)* | 0.947(0.892，1.006) |
| *P* trend | 0.958(0.947，0.970)** | 0.968（0.955，0.980）** | 0.969（0.957，0.982）** | 0.980(0.968，0.992)** | 0.988(0.976，1.000) | 0.989(0.976，1.002) |
| **Sleep patterns** |  |  |  |  |  |  |
| Poor | 1.000 | 1.000 | 1.000 | 1.000 | 1.000 | 1.000 |
| Intermediate | 1.093(1.046，1.142)** | 1.070(1.024，1.119)** | 1.070(1.023，1.119)** | 1.051(1.007，1.097)* | 1.034(0.990，1.080) | 1.029(0.985，1.075) |
| Healthy | 1.161(1.110，1.215)** | 1.122(1.071，1.177)** | 1.120(1.067，1.175)** | 1.080(1.032，1.129)** | 1.054(1.007，1.103)* | 1.046(0.998，1.096) |
| Abbreviations: FOR, Fecundability Odds Ratio; CI, Confidence Interval .  Data were analyzed using Cox proportional hazards regression models.  aModel 1 was adjusted for regional areas, both partners' ages, BMI, socioeconomic status, marital status, age of sexual debut, unhealthy lifestyle scores, wives' adverse pregnancy history and live birth history.  bModel 2 was additionally adjusted for depressive symptoms based on Model 1.  * *P*＜0.05, ** *P*＜0.01. | | | | | | |

| **eTable 3. The Relationship between Sleep Characteristics of Wives/Husbands and Infertility** | | | | | | |
| --- | --- | --- | --- | --- | --- | --- |
| **Sleep characteristics** | **Wives** | | | **Husbands** | | |
| **Unadjusted**  ***RR*(95% *CI*)** | **Model 1a**  ***RR*(95% *CI*)** | **Model 2b**  ***RR*(95% *CI*)** | **Unadjusted**  ***RR*(95% *CI*)** | **Model 1a**  ***RR*(95% *CI*)** | **Model 2b**  ***RR*(95% *CI*)** |
| **Average sleep duration(h)** |  |  |  |  |  |  |
| 7～8 | 1.000 | 1.000 | 1.000 | 1.000 | 1.000 | 1.000 |
| ＜7 | 1.049(0.946，1.164) | 0.974(0.877，1.083) | 0.967(0.871，1.075) | 1.082(0.979，1.195) | 1.008(0.911，1.116) | 0.998(0.901，1.105) |
| ≥8 | 1.119(1.003，1.248)* | 1.115(0.998，1.247) | 1.118(1.000，1.251)* | 1.036(0.922，1.164) | 1.021(0.907，1.150) | 1.025(0.910，1.154) |
| **Workday sleep duration(h)** |  |  |  |  |  |  |
| 7～8 | 1.000 | 1.000 | 1.000 | 1.000 | 1.000 | 1.000 |
| ＜7 | 1.057(0.961，1.163) | 1.001(0.908，1.104) | 0.993(0.901，1.095) | 1.095(0.997，1.201) | 1.039(0.945，1.142) | 1.027(0.934，1.130) |
| ≥8 | 1.148(1.015，1.299)* | 1.114(0.982，1.264) | 1.119(0.986，1.269) | 0.958(0.836，1.099) | 0.935(0.813，1.075) | 0.940(0.817，1.080) |
| **Weekend sleep duration(h)** |  |  |  |  |  |  |
| 7～8 | 1.000 | 1.000 | 1.000 | 1.000 | 1.000 | 1.000 |
| ＜7 | 1.130(0.987，1.294) | 1.036(0.902，1.189) | 1.028(0.895，1.181) | 1.077(0.942，1.231) | 0.999(0.872，1.145) | 0.988(0.862，1.133) |
| ≥8 | 1.113(1.009，1.227)* | 1.172(1.060，1.295)** | 1.171(1.060，1.295)** | 0.994(0.903，1.094) | 1.030(0.934，1.136) | 1.030(0.934，1.136) |
| **Mean sleep midpoint** |  |  |  |  |  |  |
| 2:30～3:30 | 1.000 | 1.000 | 1.000 | 1.000 | 1.000 | 1.000 |
| earlier than 2:30 | 1.379(1.227，1.550)** | 1.148(1.017，1.297)* | 1.150(1.018，1.298)* | 1.333(1.190，1.492)** | 1.078(0.958，1.214) | 1.081(0.960，1.217) |
| After 3:30 | 1.247(1.129，1.377)** | 1.206(1.088，1.337)** | 1.198(1.080，1.328)** | 1.050(0.950，1.162) | 1.045(0.943，1.158) | 1.035(0.933，1.148) |
| **Social jet lag(h)** |  |  |  |  |  |  |
| <1 | 1.000 | 1.000 | 1.000 | 1.000 | 1.000 | 1.000 |
| ≥1 | 1.003(0.888，1.132) | 1.008(0.890，1.141) | 1.003(0.886，1.135) | 1.075(0.953，1.213) | 1.016(0.898，1.149) | 1.008(0.891，1.140) |
| **Difficulty falling asleep** |  |  |  |  |  |  |
| No | 1.000 | 1.000 | 1.000 | 1.000 | 1.000 | 1.000 |
| Yes | 1.181(1.060，1.316)** | 1.053(0.942，1.178) | 1.034(0.923，1.157) | 1.175(1.047，1.317)** | 1.046(0.930，1.177) | 1.031(0.916，1.160) |
| **Sleep quality** |  |  |  |  |  |  |
| Good | 1.000 | 1.000 | 1.000 | 1.000 | 1.000 | 1.000 |
| Poor | 1.163(1.025，1.318)* | 1.079(0.948，1.228) | 1.035(0.905，1.184) | 1.085(0.933，1.262) | 1.035(0.888，1.207) | 0.999(0.853，1.169) |
| **Snoring** |  |  |  |  |  |  |
| Never | 1.000 | 1.000 | 1.000 | 1.000 | 1.000 | 1.000 |
| Occasionally | 1.104(1.005，1.214)* | 1.045(0.948，1.151) | 1.040(0.944，1.146) | 0.984(0.885，1.093) | 0.980(0.879，1.092) | 0.975(0.874，1.086) |
| Frequently | 1.494(1.277，1.748)** | 1.194(1.013，1.407)* | 1.186(1.006，1.397)* | 1.080(0.965，1.209) | 0.984(0.873，1.108) | 0.973(0.863，1.097) |
| **Sleep characteristics** | **Wives** | | | **Husbands** | | |
| **Unadjusted**  ***RR*(95% *CI*)** | **Model 1a**  ***RR*(95% *CI*)** | **Model 2b**  ***RR*(95% *CI*)** | **Unadjusted**  ***RR*(95% *CI*)** | **Model 1a**  ***RR*(95% *CI*)** | **Model 2b**  ***RR*(95% *CI*)** |
| **Night awakenings** |  |  |  |  |  |  |
| Never | 1.000 | 1.000 | 1.000 | 1.000 | 1.000 | 1.000 |
| Occasionally | 1.019(0.922，1.127) | 1.004(0.906，1.112) | 0.988(0.891，1.095) | 1.055(0.962，1.157) | 1.024(0.932，1.125) | 1.014(0.922，1.114) |
| Frequently | 1.267(1.074，1.494)** | 1.077(0.909，1.277) | 1.046(0.881，1.242) | 1.256(1.018，1.549)* | 1.064(0.858，1.318) | 1.037(0.836，1.286) |
| **Chronotype** |  |  |  |  |  |  |
| Intermediate types | 1.000 | 1.000 | 1.000 | 1.000 | 1.000 | 1.000 |
| Early types | 1.317(1.183，1.466)** | 1.173(1.050，1.310)** | 1.175(1.052，1.313)** | 1.174(1.057，1.304)** | 1.044(0.937，1.163) | 1.046(0.940，1.166) |
| Late types | 1.220(1.094，1.361)** | 1.208(1.080，1.350)** | 1.203(1.076，1.345)** | 1.038(0.932，1.156) | 1.050(0.941，1.172) | 1.044(0.936，1.165) |
| **Excessive daytime sleepiness** |  |  |  |  |  |  |
| No | 1.000 | 1.000 | 1.000 | 1.000 | 1.000 | 1.000 |
| Yes | 1.050(0.958，1.149) | 1.059(0.965，1.162) | 1.033(0.939，1.136) | 1.011(0.918，1.113) | 1.001(0.908，1.104) | 0.973(0.880，1.076) |
| **Nap** |  |  |  |  |  |  |
| Yes | 1.000 | 1.000 | 1.000 | 1.000 | 1.000 | 1.000 |
| No | 1.272(1.165，1.389)** | 1.154(1.053，1.264)** | 1.152(1.051，1.262)** | 1.138(1.041，1.245)** | 1.052(0.958，1.155) | 1.048(0.954，1.151) |
| **Sleep problem score** |  |  |  |  |  |  |
| 0 | 1.000 | 1.000 | 1.000 | 1.000 | 1.000 | 1.000 |
| 1 | 1.159(0.991，1.357) | 1.086(0.925，1.274) | 1.078(0.919，1.266) | 1.015(0.865，1.190) | 0.986(0.838，1.159) | 0.977(0.831，1.148) |
| 2 | 1.120(0.957，1.311) | 1.032(0.879，1.212) | 1.020(0.868，1.199) | 1.106(0.945，1.293) | 1.045(0.891，1.227) | 1.029(0.876，1.208) |
| 3 | 1.254(1.068，1.473)** | 1.143(0.969，1.348) | 1.122(0.950，1.325) | 1.166(0.994，1.368) | 1.081(0.918，1.273) | 1.056(0.896，1.245) |
| ≥4 | 1.486(1.270，1.738)** | 1.287(1.091，1.517)** | 1.249(1.056，1.477)* | 1.176(1.004，1.379)* | 1.061(0.901，1.249) | 1.021(0.864，1.206) |
| *P* trend | 1.091(1.056，1.128)** | 1.059(1.022，1.097)** | 1.051(1.014，1.089)** | 1.048(1.014，1.083)** | 1.022(0.988，1.058) | 1.013(0.978，1.049) |
| **Sleep patterns** |  |  |  |  |  |  |
| Poor | 1.000 | 1.000 | 1.000 | 1.000 | 1.000 | 1.000 |
| Intermediate | 0.794(0.710，0.888)** | 0.842(0.750，0.945)** | 0.856(0.761，0.962)** | 0.963(0.861，1.078) | 1.001(0.892，1.123) | 1.020(0.908，1.146) |
| Healthy | 0.741(0.659，0.833)** | 0.823(0.727，0.932)** | 0.845(0.744，0.960)* | 0.858(0.762，0.967)* | 0.934(0.825，1.056) | 0.964(0.850，1.094) |
| Abbreviations: RR, Risk Ratio; CI, Confidence Interval .  Data were analyzed using logistic regression models.  aModel 1 was adjusted for regional areas, both partners' ages, BMI, socioeconomic status, marital status, age of sexual debut, unhealthy lifestyle scores, wives' adverse pregnancy history and live birth history.  bModel 2 was additionally adjusted for depressive symptoms based on Model 1.  * *P*＜0.05, ** *P*＜0.01. | | | | | | |

| **eTable 4. The Relationship between Sleep Characteristics of Wives/Husbands and Fecundability by Age , Marriage and Weight** | | | | |
| --- | --- | --- | --- | --- |
| **Sleep characteristics** | **Wives [Adjusted *FOR* (95%CI)]a** | | **Husbands [Adjusted *FOR* (95%CI)]a** | |
|  | **<30 years** | **≥30 years** | **<30 years** | **≥30 years** |
| **Sleep patterns** |  |  |  |  |
| Poor | 1.000 | 1.000 | 1.000 | 1.000 |
| Intermediate | 1.052(1.002，1.104)* | 1.167(1.031，1.320)* | 1.021(0.974，1.070) | 1.081(0.958，1.220) |
| Healthy | 1.102(1.046，1.160)** | 1.205(1.056，1.376)** | 1.052(1.001，1.106)* | 0.989(0.868，1.126) |
|  | **Normal weight** | **Overweight and obesity** | **Normal weight** | **Overweight and obesity** |
| **Sleep patterns** |  |  |  |  |
| Poor | 1.000 | 1.000 | 1.000 | 1.000 |
| Intermediate | 1.065(1.012，1.120)* | 1.093(0.992，1.203) | 1.022(0.973，1.074) | 1.068(0.969，1.177) |
| Healthy | 1.107(1.049，1.169)** | 1.173(1.053，1.307)** | 1.037(0.984，1.092) | 1.084(0.975，1.205) |
|  | **Newlyweds** | **Remarriage** | **Newlyweds** | **Remarriage** |
| **Sleep patterns** |  |  |  |  |
| Poor | 1.000 | 1.000 | 1.000 | 1.000 |
| Intermediate | 1.079(1.029，1.131)** | 0.976(0.842，1.132) | 1.017(0.971，1.064) | 1.164(1.003，1.351)* |
| Healthy | 1.134(1.078，1.193)** | 1.006(0.859，1.178) | 1.035(0.986，1.087) | 1.173(1.002，1.373)* |
| Abbreviations: FOR, Fecundability Odds Ratio; CI, Confidence Interval.  Data were analyzed using Cox proportional hazards regression models.  **a**Model was adjusted for regional areas, both partners' ages, BMI, socioeconomic status, marital status, age of sexual debut, unhealthy lifestyle scores, depressive symptoms, wives' adverse pregnancy history and live birth history.  * *P*＜0.05, ** *P*＜0.01. | | | | |

| **eTable 5. The Relationship between Sleep Characteristics of Wives/Husbands and Infertility by Age , Marriage and Weight** | | | | |
| --- | --- | --- | --- | --- |
| **Sleep characteristics** | **Wives [Adjusted *RR* (95%CI)]a** | | **Husbands [Adjusted *RR* (95%CI)]a** | |
|  | **<30 years** | **≥30 years** | **<30 years** | **≥30 years** |
| **Sleep patterns** |  |  |  |  |
| Poor | 1.000 | 1.000 | 1.000 | 1.000 |
| Intermediate | 0.864(0.758，0.985)* | 0.816(0.629，1.059) | 1.084(0.950，1.236) | 0.795(0.613，1.030) |
| Healthy | 0.856(0.742，0.988)* | 0.795(0.599，1.056) | 0.987(0.855，1.138) | 0.872(0.659，1.153) |
|  | **Normal weight** | **Overweight and obesity** | **Normal weight** | **Overweight and obesity** |
| **Sleep patterns** |  |  |  |  |
| Poor | 1.000 | 1.000 | 1.000 | 1.000 |
| Intermediate | 0.866(0.754，0.995)* | 0.816(0.655，1.017) | 1.019(0.889，1.169) | 1.014(0.809，1.269) |
| Healthy | 0.858(0.739，0.996)* | 0.807(0.630，1.034) | 0.963(0.831，1.116) | 0.964(0.752，1.235) |
|  | **Newlyweds** | **Remarriage** | **Newlyweds** | **Remarriage** |
| **Sleep patterns** |  |  |  |  |
| Poor | 1.000 | 1.000 | 1.000 | 1.000 |
| Intermediate | 0.837(0.738，0.949)** | 1.005(0.728，1.388) | 1.064(0.937，1.208) | 0.807(0.592，1.099) |
| Healthy | 0.794(0.692，0.912)** | 1.240(0.882，1.742) | 1.002(0.873，1.149) | 0.784(0.563，1.091) |
| Abbreviations: RR, Risk Ratio; CI, Confidence Interval.  Data were analyzed using logistic regression models.  **a**Model was adjusted for regional areas, both partners' ages, BMI, socioeconomic status, marital status, age of sexual debut, unhealthy lifestyle scores, depressive symptoms, wives' adverse pregnancy history and live birth history.  * *P*＜0.05, ** *P*＜0.01. | | | | |

| **eTable 6. The Interaction Between Sleep Patterns and Depressive Symptom on Fecundability** | | |
| --- | --- | --- |
| **Variables** | **Unadjusted**  ***FOR*(95% *CI*)** | **Multivariate adjusteda**  ***FOR*(95% *CI*)** |
| **Wives** |  |  |
| **Depressive symptom** |  |  |
| Yes | 1.000 | 1.000 |
| No | 1.047(1.008，1.087)* | 1.042(1.003，1.083)* |
| **Depressive symptom & Sleep patterns** |  |  |
| Yes**&**Poor | 1.000 | 1.000 |
| No**&**Intermediate | 1.051(1.010，1.093)* | 1.046(1.005，1.089)* |
| No**&**Healthy | 1.112(1.068，1.156)** | 1.089(1.045，1.135)** |
|  |  |  |
| **Husbands** |  |  |
| **Depressive symptom** |  |  |
| Yes | 1.000 | 1.000 |
| No | 1.044(1.002，1.089)* | 1.037(0.994，1.081) |
| **Depressive symptom & Sleep patterns** |  |  |
| Yes**&**Poor | 1.000 | 1.000 |
| No**&**Intermediate | 1.059(1.018，1.101)** | 1.047(1.006，1.089)* |
| No**&**Healthy | 1.069(1.027，1.114)** | 1.050(1.008，1.094)* |
|  |  |  |
| **Couple** |  |  |
| **Depressive symptom** |  |  |
| Neither partner | 1.000 | 1.000 |
| Man-only | 0.953(0.907，1.002) | 0.965(0.918，1.015) |
| Woman-only | 0.953(0.912，0.995)* | 0.958(0.917，1.001) |
| Both partners | 0.934(0.871，1.000) | 0.947(0.884，1.016) |
| **Depressive symptom & Sleep patterns** |  |  |
| Depressive symptoms (both) & Unhealthy sleep (both) | 1.000 | 1.000 |
| No depressive symptoms (both) & Healthy sleep (both) | 1.104(1.049，1.162)** | 1.070(1.015，1.128)* |
| Abbreviations: FOR, Fecundability Odds Ratio; CI, Confidence Interval.  Data were analyzed using Cox proportional hazards regression models.  **a**Model was adjusted for regional areas, both partners' ages, BMI, socioeconomic status, marital status, age of sexual debut, unhealthy lifestyle scores, wives' adverse pregnancy history and live birth history.  * *P*＜0.05, ** *P*＜0.01. | | |

| **eTable 7. The Interaction Between Sleep Patterns and Depressive Symptom on Infertility** | | |
| --- | --- | --- |
| **Variables** | **Unadjusted**  ***RR*(95% *CI*)** | **Multivariate adjusted *RR*(95% *CI*)** |
| **Wives** |  |  |
| **Depressive symptom** |  |  |
| Yes | 1.000 | 1.000 |
| No | 0.850(0.770，0.937)** | 0.885(0.800，0.980)* |
| **Depressive symptom & Sleep patterns** |  |  |
| Yes**&**Poor | 1.000 | 1.000 |
| No**&**Intermediate | 0.857(0.772，0.950)** | 0.887(0.797，0.987)* |
| No**&**Healthy | 0.802(0.721，0.891)** | 0.870(0.777，0.973)* |
|  |  |  |
| **Husbands** |  |  |
| **Depressive symptom** |  |  |
| Yes | 1.000 | 1.000 |
| No | 0.859(0.771，0.956)** | 0.885(0.793，0.988)* |
| **Depressive symptom & Sleep patterns** |  |  |
| Yes**&**Poor | 1.000 | 1.000 |
| No**&**Intermediate | 0.897(0.809，0.995)* | 0.918(0.826，1.020) |
| No**&**Healthy | 0.830(0.744，0.925)** | 0.887(0.794，0.992)* |
|  |  |  |
| **Couple** |  |  |
| **Depressive symptom** |  |  |
| Neither partner | 1.000 | 1.000 |
| Man-only | 1.143(1.002，1.303)* | 1.125(0.985，1.285) |
| Woman-only | 1.160(1.036，1.299)* | 1.120(0.997，1.259) |
| Both partners | 1.341(1.129，1.591)** | 1.243(1.042，1.482)* |
| **Depressive symptom & Sleep patterns** |  |  |
| No depressive symptoms (both) & Healthy sleep (both) | 1.000 | 1.000 |
| Depressive symptoms (both) & Unhealthy sleep (both) | 1.428(1.171，1.741)** | 1.294(1.055，1.586)* |
| Abbreviations: RR, Risk Ratio; CI, Confidence Interval.  Data were analyzed using logistic regression models.  **a**Model was adjusted for regional areas, both partners' ages, BMI, socioeconomic status, marital status, age of sexual debut, unhealthy lifestyle scores, wives' adverse pregnancy history and live birth history.  * *P*＜0.05, ** *P*＜0.01. | | |

| **eTable 8. The Interaction Between Sleep Patterns and Depressive Symptom on Infertility, Adjusted Model Excluding Couples Undergoing Assisted Reproductive Technology** | | |
| --- | --- | --- |
| **Variables** | **Unadjusted**  ***RR*(95% *CI*)** | **Multivariate adjusted *RR*(95% *CI*)** |
| **Wives** |  |  |
| **Depressive symptom** |  |  |
| Yes | 1.000 | 1.000 |
| No | 0.863(0.775，0.960)** | 0.902(0.807，1.007) |
| **Depressive symptom & Sleep patterns** |  |  |
| Yes**&**Poor | 1.000 | 1.000 |
| No**&**Intermediate | 0.867(0.776，0.970)* | 0.898(0.800，1.008) |
| No**&**Healthy | 0.780(0.695，0.875)** | 0.848(0.751，0.958)** |
|  |  |  |
| **Husbands** |  |  |
| **Depressive symptom** |  |  |
| Yes | 1.000 | 1.000 |
| No | 0.855(0.761，0.960)** | 0.879(0.781，0.990)* |
| **Depressive symptom & Sleep patterns** |  |  |
| Yes**&**Poor | 1.000 | 1.000 |
| No**&**Intermediate | 0.883(0.790，0.988)* | 0.901(0.804，1.010) |
| No**&**Healthy | 0.806(0.717，0.907)** | 0.864(0.765，0.975)* |
|  |  |  |
| **Couple** |  |  |
| **Depressive symptom** |  |  |
| Neither partner | 1.000 | 1.000 |
| Man-only | 1.150(0.998，1.325) | 1.134(0.982，1.309) |
| Woman-only | 1.142(1.009，1.292)* | 1.099(0.968，1.248) |
| Both partners | 1.328(1.103，1.600)** | 1.233(1.019，1.491)* |
| **Depressive symptom & Sleep patterns** |  |  |
| No depressive symptoms (both) & Healthy sleep (both) | 1.000 | 1.000 |
| Depressive symptoms (both) & Unhealthy sleep (both) | 1.424(1.149，1.764)** | 1.289(1.035，1.606)* |
| Abbreviations: RR, Risk Ratio; CI, Confidence Interval.  Data were analyzed using logistic regression models.  **a**Model was adjusted for regional areas, both partners' ages, BMI, socioeconomic status, marital status, age of sexual debut, unhealthy lifestyle scores, wives' adverse pregnancy history and live birth history.  * *P*＜0.05, ** *P*＜0.01. | | |

| **eTable 9. The Relationship between Sleep Characteristics of Wives/Husbands and Infertility, Adjusted Model Excluding Couples Undergoing Assisted Reproductive Technology** | | | | | | |
| --- | --- | --- | --- | --- | --- | --- |
| **Sleep characteristics** | **Wives** | | | **Husbands** | | |
| **Unadjusted**  ***RR*(95% *CI*)** | **Model 1a**  ***RR*(95% *CI*)** | **Model 2b**  ***RR*(95% *CI*)** | **Unadjusted**  ***RR*(95% *CI*)** | **Model 1a**  ***RR*(95% *CI*)** | **Model 2b**  ***RR*(95% *CI*)** |
| **Average sleep duration(h)** |  |  |  |  |  |  |
| 7～8 | 1.000 | 1.000 | 1.000 | 1.000 | 1.000 | 1.000 |
| ＜7 | 1.078(0.964，1.206) | 0.997(0.889，1.117) | 0.990(0.884，1.110) | 1.109(0.996，1.235) | 1.026(0.919，1.145) | 1.015(0.909，1.133) |
| ≥8 | 1.144(1.016，1.287)* | 1.153(1.021，1.301)* | 1.155(1.024，1.304)* | 1.016(0.894，1.153) | 1.008(0.885，1.148) | 1.011(0.888，1.152) |
| **Workday sleep duration(h)** |  |  |  |  |  |  |
| 7～8 | 1.000 | 1.000 | 1.000 | 1.000 | 1.000 | 1.000 |
| ＜7 | 1.076(0.970，1.193) | 1.014(0.912，1.127) | 1.007(0.906，1.120) | 1.127(1.019，1.247)* | 1.064(0.960，1.179) | 1.051(0.948，1.166) |
| ≥8 | 1.155(1.010，1.321)* | 1.133(0.988，1.300) | 1.138(0.992，1.305) | 0.992(0.856，1.150) | 0.977(0.840，1.136) | 0.981(0.843，1.140) |
| **Weekend sleep duration(h)** |  |  |  |  |  |  |
| 7～8 | 1.000 | 1.000 | 1.000 | 1.000 | 1.000 | 1.000 |
| ＜7 | 1.141(0.988，1.319) | 1.041(0.898，1.207) | 1.034(0.892，1.199) | 1.121(0.973，1.292) | 1.038(0.898，1.200) | 1.028(0.889，1.188) |
| ≥8 | 1.054(0.948，1.171) | 1.113(0.999，1.240) | 1.113(0.998，1.240) | 0.941(0.848，1.044) | 0.980(0.881，1.090) | 0.980(0.881，1.090) |
| **Mean sleep midpoint** |  |  |  |  |  |  |
| 2:30～3:30 | 1.000 | 1.000 | 1.000 | 1.000 | 1.000 | 1.000 |
| earlier than 2:30 | 1.337(1.177，1.518)** | 1.111(0.973，1.268) | 1.111(0.973，1.269) | 1.372(1.214，1.550)** | 1.113(0.980，1.265) | 1.117(0.983，1.269) |
| After 3:30 | 1.242(1.116，1.383)** | 1.201(1.075，1.343)** | 1.194(1.068，1.335)** | 1.076(0.965，1.200) | 1.071(0.958，1.198) | 1.060(0.948，1.186) |
| **Social jet lag(h)** |  |  |  |  |  |  |
| <1 | 1.000 | 1.000 | 1.000 | 1.000 | 1.000 | 1.000 |
| ≥1 | 1.022(0.897，1.165) | 1.033(0.903，1.180) | 1.029(0.900，1.176) | 1.081(0.949，1.232) | 1.023(0.895，1.169) | 1.015(0.888，1.160) |
| **Difficulty falling asleep** |  |  |  |  |  |  |
| No | 1.000 | 1.000 | 1.000 | 1.000 | 1.000 | 1.000 |
| Yes | 1.208(1.075，1.357)** | 1.075(0.953，1.212) | 1.058(0.937，1.195) | 1.231(1.089，1.391)** | 1.100(0.970，1.247) | 1.084(0.955，1.230) |
| **Sleep quality** |  |  |  |  |  |  |
| Good | 1.000 | 1.000 | 1.000 | 1.000 | 1.000 | 1.000 |
| Poor | 1.144(0.997，1.311) | 1.054(0.916，1.213) | 1.015(0.877，1.175) | 1.074(0.911，1.266) | 1.023(0.866，1.210) | 0.984(0.829，1.168) |
| **Snoring** |  |  |  |  |  |  |
| Never | 1.000 | 1.000 | 1.000 | 1.000 | 1.000 | 1.000 |
| Occasionally | 1.133(1.022，1.256)* | 1.064(0.958，1.182) | 1.061(0.955，1.179) | 1.002(0.893，1.123) | 0.987(0.877，1.111) | 0.982(0.873，1.105) |
| Frequently | 1.688(1.433，1.988)** | 1.325(1.116，1.573)** | 1.317(1.109，1.563)** | 1.106(0.979，1.250) | 0.989(0.869，1.126) | 0.979(0.860，1.115) |
| **Sleep characteristics** | **Wives** | | | **Husbands** | | |
| **Unadjusted**  ***RR*(95% *CI*)** | **Model 1a**  ***RR*(95% *CI*)** | **Model 2b**  ***RR*(95% *CI*)** | **Unadjusted**  ***RR*(95% *CI*)** | **Model 1a**  ***RR*(95% *CI*)** | **Model 2b**  ***RR*(95% *CI*)** |
| **Night awakenings** |  |  |  |  |  |  |
| Never | 1.000 | 1.000 | 1.000 | 1.000 | 1.000 | 1.000 |
| Occasionally | 1.005(0.901，1.120) | 0.988(0.884，1.103) | 0.973(0.871，1.088) | 1.069(0.967，1.182) | 1.035(0.935，1.147) | 1.024(0.925，1.135) |
| Frequently | 1.235(1.032，1.478)* | 1.038(0.863，1.249) | 1.011(0.839，1.219) | 1.280(1.021，1.605)* | 1.078(0.855，1.358) | 1.049(0.831，1.324) |
| **Chronotype** |  |  |  |  |  |  |
| Intermediate types | 1.000 | 1.000 | 1.000 | 1.000 | 1.000 | 1.000 |
| Early types | 1.250(1.112，1.404)** | 1.110(0.985，1.252) | 1.112(0.986，1.254) | 1.142(1.019，1.280)* | 1.013(0.901，1.139) | 1.015(0.903，1.141) |
| Late types | 1.217(1.083，1.368)** | 1.207(1.070，1.361)** | 1.202(1.066，1.355)** | 1.037(0.923，1.165) | 1.049(0.931，1.181) | 1.042(0.925，1.173) |
| **Excessive daytime sleepiness** |  |  |  |  |  |  |
| No | 1.000 | 1.000 | 1.000 | 1.000 | 1.000 | 1.000 |
| Yes | 1.035(0.938，1.143) | 1.041(0.941，1.152) | 1.018(0.918，1.130) | 0.984(0.886，1.093) | 0.968(0.870，1.077) | 0.938(0.840，1.046) |
| **Nap** |  |  |  |  |  |  |
| Yes | 1.000 | 1.000 | 1.000 | 1.000 | 1.000 | 1.000 |
| No | 1.270(1.155，1.397)** | 1.156(1.047，1.277)** | 1.154(1.045，1.275)** | 1.162(1.055，1.281)** | 1.084(0.980，1.199) | 1.080(0.976，1.195) |
| **Sleep problem score** |  |  |  |  |  |  |
| 0 | 1.000 | 1.000 | 1.000 | 1.000 | 1.000 | 1.000 |
| 1 | 1.177(0.990，1.399) | 1.096(0.920，1.307) | 1.091(0.915，1.301) | 1.079(0.905，1.285) | 1.049(0.878，1.254) | 1.040(0.870，1.244) |
| 2 | 1.173(0.987，1.394) | 1.073(0.900，1.280) | 1.064(0.891，1.270) | 1.150(0.967，1.367) | 1.083(0.908，1.293) | 1.068(0.894，1.275) |
| 3 | 1.316(1.104，1.569)** | 1.193(0.995，1.429) | 1.176(0.981，1.411) | 1.266(1.062，1.509)** | 1.172(0.980，1.403) | 1.148(0.958，1.375) |
| ≥4 | 1.557(1.312，1.849)** | 1.338(1.117，1.602)** | 1.308(1.089，1.572)** | 1.268(1.065，1.510)** | 1.140(0.952，1.364) | 1.098(0.915，1.319) |
| *P* trend | 1.104(1.066，1.145)** | 1.064(1.026，1.103)** | 1.070(1.030，1.112)** | 1.070(1.030，1.112)** | 1.036(0.999，1.075) | 1.027(0.989，1.067) |
| **Sleep patterns** |  |  |  |  |  |  |
| Poor | 1.000 | 1.000 | 1.000 | 1.000 | 1.000 | 1.000 |
| Intermediate | 0.794(0.704，0.896)** | 0.844(0.745，0.956)** | 0.854(0.753，0.969)* | 0.949(0.840，1.071) | 0.987(0.872，1.118) | 0.936(0.816，1.074) |
| Healthy | 0.714(0.629，0.811)** | 0.797(0.696，0.912)** | 0.813(0.708，0.933)** | 0.829(0.729，0.943)** | 0.907(0.794，1.036) | 1.007(0.888，1.142) |
| Abbreviations: RR, Risk Ratio; CI, Confidence Interval .  Data were analyzed using logistic regression models.  aModel 1 was adjusted for regional areas, both partners' ages, BMI, socioeconomic status, marital status, age of sexual debut, unhealthy lifestyle scores, wives' adverse pregnancy history and live birth history.  bModel 2 was additionally adjusted for depressive symptoms based on Model 1.  * *P*＜0.05, ** *P*＜0.01. | | | | | | |

| **eTable 10. The Relationship between Sleep Characteristics of Couples and Fecundability** | | | |
| --- | --- | --- | --- |
| **Sleep characteristics** | **Couple** | | |
| **Unadjusted Model**  ***FOR*(95% *CI*)** | **Model 1a**  ***FOR*(95% *CI*)** | **Model 2b**  ***FOR*(95% *CI*)** |
| **Sleep deficiency** |  |  |  |
| Neither partner | 1.000 | 1.000 | 1.000 |
| Man-only | 0.992(0.950，1.035) | 1.023(0.980，1.068) | 1.027(0.983，1.072) |
| Woman-only | 0.993(0.950，1.038) | 1.024(0.980，1.071) | 1.028(0.983，1.075) |
| Both partners | 0.938(0.885，0.993)* | 0.993(0.937，1.052) | 0.999(0.942，1.058) |
| **Sleep midpoint after 3:30** |  |  |  |
| Neither partner | 1.000 | 1.000 | 1.000 |
| Man-only | 1.038(0.991，1.087) | 1.016(0.970，1.064) | 1.019(0.973，1.068) |
| Woman-only | 0.931(0.888，0.977)** | 0.931(0.887，0.978)** | 0.933(0.889，0.980)** |
| Both partners | 0.932(0.889，0.978)** | 0.914(0.870，0.960)** | 0.917(0.873，0.964)** |
| **Social jet lag** |  |  |  |
| Neither partner | 1.000 | 1.000 | 1.000 |
| Man-only | 0.988(0.938，1.040) | 1.008(0.957，1.062) | 1.010(0.959，1.064) |
| Woman-only | 1.001(0.952，1.053) | 0.995(0.946，1.047) | 0.996(0.947，1.048) |
| Both partners | 0.961(0.874，1.056) | 0.985(0.896，1.083) | 0.989(0.900，1.088) |
| **Difficulty falling asleep** |  |  |  |
| Neither partner | 1.000 | 1.000 | 1.000 |
| Man-only | 0.91(0.865，0.957)** | 0.942(0.896，0.992)* | 0.946(0.898，0.995)* |
| Woman-only | 0.929(0.887，0.974)** | 0.963(0.919，1.009) | 0.968(0.923，1.015) |
| Both partners | 0.863(0.790，0.942)** | 0.935(0.856，1.022) | 0.943(0.862，1.031) |
| **Poor sleep quality** |  |  |  |
| Neither partner | 1.000 | 1.000 | 1.000 |
| Man-only | 0.938(0.880，1.000) | 0.956(0.897，1.020) | 0.964(0.902，1.029) |
| Woman-only | 0.938(0.890，0.988)* | 0.962(0.913，1.014) | 0.971(0.919，1.025) |
| Both partners | 0.952(0.837，1.083) | 0.982(0.863，1.117) | 0.996(0.874，1.134) |
| **Frequently snoring** |  |  |  |
| Neither partner | 1.000 | 1.000 | 1.000 |
| Man-only | 0.974(0.938，1.011) | 1.004(0.966，1.043) | 1.006(0.968，1.045) |
| Woman-only | 0.857(0.790，0.929)** | 0.922(0.849，1.000) | 0.923(0.851，1.002) |
| Both partners | 0.733(0.659，0.814)** | 0.814(0.732，0.906)** | 0.816(0.733，0.908)** |
| **Frequently night awakenings** |  |  |  |
| Neither partner | 1.000 | 1.000 | 1.000 |
| Man-only | 0.961(0.881，1.048) | 1.001(0.917，1.092) | 1.005(0.921，1.097) |
| Woman-only | 0.913(0.857，0.971)** | 0.943(0.886，1.004) | 0.947(0.889，1.008) |
| Both partners | 0.832(0.678，1.02) | 0.905(0.738，1.110) | 0.909(0.741，1.115) |
| **Sleep characteristics** | **Couple** | | |
|  | **Unadjusted Model**  ***FOR*(95% *CI*)** | **Model 1a**  ***FOR*(95% *CI*)** | **Model 2b**  ***FOR*(95% *CI*)** |
| **Chronotype(Late types)** |  |  |  |
| Neither partner | 1.000 | 1.000 | 1.000 |
| Man-only | 1.034(0.988，1.082) | 1.003(0.958，1.050) | 1.005(0.960，1.052) |
| Woman-only | 0.952(0.910，0.995)* | 0.935(0.893，0.978)** | 0.936(0.894，0.979)** |
| Both partners | 0.958(0.914，1.005) | 0.932(0.888，0.979)** | 0.934(0.890，0.981)** |
| **Excessive daytime sleepiness** |  |  |  |
| Neither partner | 1.000 | 1.000 | 1.000 |
| Man-only | 1.021(0.975，1.068) | 1.032(0.986，1.080) | 1.039(0.992，1.088) |
| Woman-only | 0.996(0.956，1.037) | 0.991(0.951，1.033) | 0.998(0.957，1.041) |
| Both partners | 0.993(0.94，1.048) | 0.982(0.931，1.037) | 0.997(0.943，1.054) |
| **No nap** |  |  |  |
| Neither partner | 1.000 | 1.000 | 1.000 |
| Man-only | 0.988(0.945，1.034) | 0.992(0.948，1.038) | 0.993(0.948，1.039) |
| Woman-only | 0.945(0.905，0.987)* | 0.970(0.928，1.013) | 0.971(0.929，1.015) |
| Both partners | 0.896(0.855，0.938)** | 0.922(0.879，0.968)** | 0.924(0.880，0.969)** |
| **Sleep problem score**≥4 | 0.948(0.931，0.964)** | 0.962(0.945，0.980)** | 0.965(0.948，0.983)** |
| Neither partner | 1.000 | 1.000 | 1.000 |
| Man-only | 0.950(0.907，0.995)* | 0.973(0.928，1.019) | 0.977(0.932，1.025) |
| Woman-only | 0.893(0.851，0.937)** | 0.923(0.879，0.970)** | 0.928(0.883，0.975)** |
| Both partners | 0.856(0.799，0.917)** | 0.891(0.831，0.956)** | 0.900(0.838，0.966)** |
| **Healthy sleep patterns** |  |  |  |
| Neither partner | 1.000 | 1.000 | 1.000 |
| Man-only | 1.050(1.005，1.098)* | 1.040(0.995，1.088) | 1.036(0.991，1.084) |
| Woman-only | 1.108(1.061，1.157)** | 1.085(1.039，1.134)** | 1.081(1.034，1.130)** |
| Both partners | 1.113(1.061，1.167)** | 1.076(1.025，1.130)** | 1.068(1.016，1.122)** |
| Abbreviations: FOR, Fecundability Odds Ratio; CI, Confidence Interval .  Data were analyzed using Cox proportional hazards regression models.  aModel 1 was adjusted for regional areas, both partners' ages, BMI, socioeconomic status, marital status, age of sexual debut, unhealthy lifestyle scores, wives' adverse pregnancy history and live birth history.  bModel 2 was additionally adjusted for depressive symptoms based on Model 1.  * *P*＜0.05, ** *P*＜0.01. | | | |

| **eTable 11. The Relationship between Sleep Characteristics of Couples and Infertility** | | | |
| --- | --- | --- | --- |
| **Sleep characteristics** | **Couple** | | |
| **Unadjusted**  ***RR*(95% *CI*)** | **Model 1a**  ***RR*(95% *CI*)** | **Model 2b**  ***RR*(95% *CI*)** |
| **sleep deficiency** |  |  |  |
| Neither partner | 1.000 | 1.000 | 1.000 |
| Man-only | 1.074(0.959，1.203) | 0.999(0.890，1.121) | 0.986(0.878，1.107) |
| Woman-only | 1.012(0.898，1.141) | 0.935(0.827，1.056) | 0.926(0.819，1.046) |
| Both partners | 1.073(0.923，1.248) | 0.955(0.818，1.113) | 0.939(0.805，1.096) |
| **Sleep midpoint after 3:30** |  |  |  |
| Neither partner | 1.000 | 1.000 | 1.000 |
| Man-only | 0.931(0.820，1.057) | 0.996(0.875，1.134) | 0.985(0.865，1.122) |
| Woman-only | 1.174(1.038，1.329)* | 1.184(1.042，1.345)** | 1.175(1.034，1.335)* |
| Both partners | 1.086(0.957，1.233) | 1.145(1.003，1.306)* | 1.130(0.990，1.289) |
| **Social jet lag** |  |  |  |
| Neither partner | 1.000 | 1.000 | 1.000 |
| Man-only | 1.074(0.938，1.230) | 1.007(0.877，1.156) | 1.000(0.871，1.148) |
| Woman-only | 0.996(0.869，1.142) | 0.998(0.868，1.147) | 0.995(0.866，1.143) |
| Both partners | 1.077(0.843，1.376) | 1.049(0.817，1.347) | 1.033(0.804，1.327) |
| **Difficulty falling asleep** |  |  |  |
| Neither partner | 1.000 | 1.000 | 1.000 |
| Man-only | 1.179(1.034，1.345)* | 1.066(0.932，1.220) | 1.051(0.919，1.203) |
| Woman-only | 1.186(1.051，1.338)** | 1.071(0.945，1.212) | 1.051(0.927，1.192) |
| Both partners | 1.321(1.064，1.641)* | 1.043(0.834，1.304) | 1.011(0.808，1.265) |
| **Poor sleep quality** |  |  |  |
| Neither partner | 1.000 | 1.000 | 1.000 |
| Man-only | 1.122(0.950，1.326) | 1.075(0.907，1.273) | 1.040(0.874，1.236) |
| Woman-only | 1.192(1.043，1.362)* | 1.107(0.965，1.270) | 1.064(0.923，1.226) |
| Both partners | 1.053(0.749，1.482) | 0.946(0.668，1.339) | 0.880(0.619，1.251) |
| **Frequently snoring** |  |  |  |
| Neither partner | 1.000 | 1.000 | 1.000 |
| Man-only | 1.054(0.953，1.165) | 0.970(0.874，1.077) | 0.962(0.867，1.069) |
| Woman-only | 1.313(1.076，1.602)** | 1.077(0.877，1.322) | 1.069(0.871，1.313) |
| Both partners | 1.731(1.370，2.187)** | 1.305(1.024，1.664)* | 1.293(1.014，1.649)* |
| **Frequently night awakenings** |  |  |  |
| Neither partner | 1.000 | 1.000 | 1.000 |
| Man-only | 1.184(0.949，1.477) | 1.035(0.825，1.297) | 1.014(0.809，1.272) |
| Woman-only | 1.235(1.057，1.444)** | 1.069(0.910，1.254) | 1.050(0.894，1.233) |
| Both partners | 1.543(0.960，2.481) | 1.158(0.711，1.885) | 1.129(0.693，1.839) |
| **Sleep characteristics** | **Couple** | | |
| **Unadjusted**  ***RR*(95% *CI*)** | **Model 1a**  ***RR*(95% *CI*)** | **Model 2b**  ***RR*(95% *CI*)** |
| **Chronotype(Late types)** |  |  |  |
| Neither partner | 1.000 | 1.000 | 1.000 |
| Man-only | 0.916(0.809，1.037) | 0.993(0.875，1.128) | 0.986(0.868，1.120) |
| Woman-only | 1.038(0.923，1.167) | 1.097(0.971，1.238) | 1.091(0.966，1.232) |
| Both partners | 1.028(0.906，1.167) | 1.132(0.992，1.291) | 1.121(0.982，1.279) |
| **Excessive daytime sleepiness** |  |  |  |
| Neither partner | 1.000 | 1.000 | 1.000 |
| Man-only | 0.981(0.868，1.110) | 0.993(0.875，1.128) | 0.939(0.827，1.066) |
| Woman-only | 1.027(0.921，1.146) | 1.097(0.971，1.238) | 1.007(0.899，1.128) |
| Both partners | 1.080(0.937，1.244) | 1.132(0.992，1.291) | 1.033(0.890，1.199) |
| **No nap** |  |  |  |
| Neither partner | 1.000 | 1.000 | 1.000 |
| Man-only | 1.107(0.978，1.252) | 1.030(0.908，1.170) | 1.024(0.902，1.163) |
| Woman-only | 1.263(1.126，1.416)** | 1.146(1.019，1.290)* | 1.142(1.015，1.285)* |
| Both partners | 1.370(1.215，1.544)** | 1.188(1.047，1.348)** | 1.184(1.043，1.344)** |
| **Sleep problem score**≥4 | 1.118(1.070，1.169)** | 1.075(1.026，1.126)** | 1.062(1.012，1.114)* |
| Neither partner | 1.000 | 1.000 | 1.000 |
| Man-only | 1.131(0.999，1.280) | 1.068(0.941，1.212) | 1.043(0.917，1.186) |
| Woman-only | 1.372(1.216，1.548)** | 1.260(1.112，1.428)** | 1.238(1.090，1.406)** |
| Both partners | 1.235(1.035，1.474)* | 1.111(0.925，1.334) | 1.065(0.884，1.283) |
| **Healthy sleep patterns** |  |  |  |
| Neither partner | 1.000 | 1.000 | 1.000 |
| Man-only | 0.851(0.756，0.959)** | 0.893(0.791，1.009) | 0.909(0.803，1.027) |
| Woman-only | 0.835(0.743，0.938)** | 0.889(0.788，1.003) | 0.904(0.800，1.021) |
| Both partners | 0.811(0.712，0.923)** | 0.906(0.792，1.038) | 0.937(0.817，1.075) |
| Abbreviations: RR, Risk Ratio; CI, Confidence Interval .  Data were analyzed using logistic regression models.  aModel 1 was adjusted for regional areas, both partners' ages, BMI, socioeconomic status, marital status, age of sexual debut, unhealthy lifestyle scores, wives' adverse pregnancy history and live birth history.  bModel 2 was additionally adjusted for depressive symptoms based on Model 1.  * *P*＜0.05, ** *P*＜0.01. | | | |

| **eTable 12.The Relationship between Sleep Characteristics of Couple and Fertility Outcomes by Age, Marriage and Weight** | | | | |
| --- | --- | --- | --- | --- |
| **Sleep characteristics** | **fecundability [Adjusted *FOR* (95%CI)]a** | | **Infertility [Adjusted *RR* (95%CI)]a** | |
|  | **<30 years** | **≥30 years** | **<30 years** | **≥30 years** |
| **Sleep problem score**≥4 |  |  |  |  |
| Neither partner | 1.000 | 1.000 | 1.000 | 1.000 |
| Man-only | 0.974(0.925，1.025) | 0.991(0.869，1.131) | 0.991(0.857，1.147) | 1.291(0.977，1.706) |
| Woman-only | 0.937(0.888，0.988)* | 0.866(0.756，0.991)* | 1.224(1.061，1.411)** | 1.321(0.995，1.754) |
| Both partners | 0.916(0.848，0.989)* | 0.800(0.657，0.975)* | 1.018(0.826，1.255) | 1.293(0.852，1.961) |
| **Healthy sleep patterns** |  |  |  |  |
| Neither partner | 1.000 | 1.000 | 1.000 | 1.000 |
| Man-only | 1.049(1.000，1.101) | 0.955(0.841，1.084) | 0.908(0.789，1.046) | 1.044(0.786，1.385) |
| Woman-only | 1.073(1.023，1.126)** | 1.136(1.003，1.288)* | 0.937(0.813，1.079) | 0.956(0.713，1.282) |
| Both partners | 1.079(1.024，1.138)** | 1.007(0.875，1.160) | 0.955(0.811，1.124) | 1.092(0.787，1.515) |
| **Sleep characteristics** | **fecundability [Adjusted *FOR* (95%CI)]a** | | **Infertility [Adjusted *RR* (95%CI)]a** | |
|  | **Normal weight** | **Overweight and obesity** | **Normal weight** | **Overweight and obesity** |
| **Sleep problem score**≥4 |  |  |  |  |
| Neither partner | 1.000 | 1.000 | 1.000 | 1.000 |
| Man-only | 0.993(0.942，1.047) | 0.909(0.814，1.014) | 1.025(0.882，1.190) | 1.098(0.854，1.412) |
| Woman-only | 0.947(0.895，1.002) | 0.867(0.779，0.964)* | 1.201(1.032，1.397)* | 1.349(1.063，1.711)* |
| Both partners | 0.891(0.822，0.967)** | 0.902(0.776，1.047) | 1.084(0.871，1.349) | 1.048(0.737，1.491) |
| **Healthy sleep patterns** |  |  |  |  |
| Neither partner | 1.000 | 1.000 | 1.000 | 1.000 |
| Man-only | 1.028(0.977，1.081) | 1.060(0.959，1.170) | 0.960(0.829，1.112) | 0.867(0.679，1.106) |
| Woman-only | 1.066(1.015，1.120)* | 1.133(1.022，1.255)* | 0.972(0.839，1.126) | 0.847(0.655，1.096) |
| Both partners | 1.063(1.007，1.123)* | 1.082(0.958，1.221) | 0.966(0.815，1.144) | 1.070(0.798，1.434) |
| **Sleep characteristics** | **fecundability [Adjusted *FOR* (95%CI)]a** | | **Infertility [Adjusted *RR* (95%CI)]a** | |
|  | **Newlyweds** | **Remarriage** | **Newlyweds** | **Remarriage** |
| **Sleep problem score**≥4 |  |  |  |  |
| Neither partner | 1.000 | 1.000 | 1.000 | 1.000 |
| Man-only | 0.990(0.942，1.040) | 0.846(0.716，1.000) | 0.804(0.982，0.853) | 1.458(1.048，2.029)* |
| Woman-only | 0.917(0.870，0.966)** | 1.019(0.867，1.197) | 1.270(1.108，1.456)** | 1.044(0.738，1.477) |
| Both partners | 0.897(0.832，0.967)** | 0.926(0.737，1.163) | 1.089(0.892，1.329) | 0.870(0.518，1.463) |
| **Healthy sleep patterns** |  |  |  |  |
| Neither partner | 1.000 | 1.000 | 1.000 | 1.000 |
| Man-only | 1.035(0.988，1.086) | 1.062(0.913，1.236) | 0.938(0.819，1.074) | 0.913(0.648，1.285) |
| Woman-only | 1.089(1.040，1.141)** | 1.008(0.864，1.175) | 0.887(0.772，1.018) | 1.305(0.929，1.834) |
| Both partners | 1.073(1.018，1.130)** | 1.048(0.884，1.243) | 0.956(0.816，1.120) | 1.152(0.782，1.698) |
| Abbreviations: RR, Risk Ratio; FOR, Fecundability Odds Ratio; CI, Confidence Interval.  Data were analyzed using Cox proportional hazards regression models and logistic regression models.  **a**Model was adjusted for regional areas, both partners' ages, BMI, socioeconomic status, marital status, age of sexual debut, unhealthy lifestyle scores, depressive symptoms, wives' adverse pregnancy history and live birth history.  * *P*＜0.05, ** *P*＜0.01. | | | | |

| **eTable 13. The Relationship between Sleep Characteristics of Couples and Infertility, Adjusted Model Excluding Couples Undergoing Assisted Reproductive Technology** | | | |
| --- | --- | --- | --- |
| **Sleep characteristics** | **Couple** | | |
| **Unadjusted**  ***RR*(95% *CI*)** | **Model 1a**  ***RR*(95% *CI*)** | **Model 2b**  ***RR*(95% *CI*)** |
| **sleep deficiency** |  |  |  |
| Neither partner | 1.000 | 1.000 | 1.000 |
| Man-only | 1.083(0.958，1.225) | 0.997(0.879，1.130) | 0.984(0.867，1.116) |
| Woman-only | 1.007(0.884，1.147) | 0.921(0.807，1.053) | 0.914(0.800，1.044) |
| Both partners | 1.150(0.981，1.350) | 1.009(0.857，1.189) | 0.994(0.844，1.171) |
| **Sleep midpoint after 3:30** |  |  |  |
| Neither partner | 1.000 | 1.000 | 1.000 |
| Man-only | 0.946(0.825，1.086) | 1.012(0.879，1.165) | 1.000(0.869，1.152) |
| Woman-only | 1.177(1.030，1.346)* | 1.185(1.032，1.361)* | 1.178(1.026，1.353)* |
| Both partners | 1.103(0.961，1.264) | 1.162(1.008，1.340)* | 1.148(0.995，1.325) |
| **Social jet lag** |  |  |  |
| Neither partner | 1.000 | 1.000 | 1.000 |
| Man-only | 1.070(0.924，1.239) | 1.006(0.866，1.169) | 1.000(0.860，1.162) |
| Woman-only | 1.007(0.869，1.167) | 1.017(0.875，1.182) | 1.014(0.873，1.179) |
| Both partners | 1.125(0.866，1.461) | 1.097(0.840，1.432) | 1.082(0.828，1.413) |
| **Difficulty falling asleep** |  |  |  |
| Neither partner | 1.000 | 1.000 | 1.000 |
| Man-only | 1.242(1.079，1.430)** | 1.127(0.976，1.301) | 1.111(0.961，1.283) |
| Woman-only | 1.216(1.067，1.385)** | 1.096(0.958，1.253) | 1.079(0.943，1.236) |
| Both partners | 1.392(1.104，1.753)** | 1.101(0.868，1.397) | 1.071(0.843，1.360) |
| **Poor sleep quality** |  |  |  |
| Neither partner | 1.000 | 1.000 | 1.000 |
| Man-only | 1.099(0.916，1.318) | 1.051(0.874，1.264) | 1.013(0.839，1.223) |
| Woman-only | 1.164(1.006，1.346)* | 1.074(0.925，1.247) | 1.036(0.887，1.209) |
| Both partners | 1.078(0.747，1.554) | 0.962(0.662，1.397) | 0.895(0.613，1.305) |
| **Frequently snoring** |  |  |  |
| Neither partner | 1.000 | 1.000 | 1.000 |
| Man-only | 1.059(0.950，1.181) | 0.964(0.860，1.080) | 0.957(0.854，1.073) |
| Woman-only | 1.458(1.184，1.794)** | 1.176(0.949，1.458) | 1.169(0.943，1.449) |
| Both partners | 1.966(1.544，2.502)** | 1.446(1.125，1.860)** | 1.434(1.115，1.844)** |
| **Frequently night awakenings** |  |  |  |
| Neither partner | 1.000 | 1.000 | 1.000 |
| Man-only | 1.186(0.934，1.506) | 1.032(0.808，1.317) | 1.011(0.791，1.291) |
| Woman-only | 1.209(1.020，1.434)* | 1.036(0.870，1.234) | 1.020(0.856，1.216) |
| Both partners | 1.608(0.972，2.661) | 1.191(0.710，1.999) | 1.162(0.692，1.951) |
| **Sleep characteristics** | **Couple** | | |
| **Unadjusted**  ***RR*(95% *CI*)** | **Model 1a**  ***RR*(95% *CI*)** | **Model 2b**  ***RR*(95% *CI*)** |
| **Chronotype(Late types)** |  |  |  |
| Neither partner | 1.000 | 1.000 | 1.000 |
| Man-only | 0.940(0.822，1.076) | 1.018(0.887，1.168) | 1.010(0.880，1.159) |
| Woman-only | 1.081(0.952，1.227) | 1.142(1.001，1.301)* | 1.136(0.997，1.295) |
| Both partners | 1.052(0.918，1.207) | 1.162(1.007，1.340)* | 1.151(0.997，1.328) |
| **Excessive daytime sleepiness** |  |  |  |
| Neither partner | 1.000 | 1.000 | 1.000 |
| Man-only | 0.943(0.824，1.078) | 0.917(0.800，1.052) | 0.892(0.776，1.025) |
| Woman-only | 1.004(0.892，1.131) | 1.003(0.889，1.131) | 0.983(0.869，1.112) |
| Both partners | 1.052(0.902，1.227) | 1.051(0.898，1.229) | 0.997(0.848，1.172) |
| **No nap** |  |  |  |
| Neither partner | 1.000 | 1.000 | 1.000 |
| Man-only | 1.122(0.982，1.282) | 1.053(0.918，1.208) | 1.046(0.912，1.200) |
| Woman-only | 1.249(1.102，1.414)** | 1.136(0.999，1.292) | 1.132(0.995，1.287) |
| Both partners | 1.397(1.228，1.590)** | 1.227(1.070，1.406)** | 1.222(1.066，1.401)** |
| **Sleep problem score**≥4 |  |  |  |
| Neither partner | 1.000 | 1.000 | 1.000 |
| Man-only | 1.153(1.009，1.318)* | 1.085(0.946，1.243) | 1.059(0.922，1.217) |
| Woman-only | 1.389(1.219，1.582)** | 1.269(1.109，1.453)** | 1.253(1.092，1.437)** |
| Both partners | 1.286(1.064，1.554)** | 1.150(0.946，1.400) | 1.107(0.907，1.351) |
| **Healthy sleep patterns** |  |  |  |
| Neither partner | 1.000 | 1.000 | 1.000 |
| Man-only | 0.831(0.730，0.946)** | 0.877(0.768，1.001) | 0.892(0.780，1.019) |
| Woman-only | 0.803(0.707，0.912)** | 0.859(0.753，0.979)* | 0.870(0.762，0.993)* |
| Both partners | 0.772(0.670，0.889)** | 0.866(0.747，1.004) | 0.892(0.768，1.037) |
| Abbreviations: RR, Risk Ratio; CI, Confidence Interval .  Data were analyzed using logistic regression models.  aModel 1 was adjusted for regional areas, both partners' ages, BMI, socioeconomic status, marital status, age of sexual debut, unhealthy lifestyle scores, wives' adverse pregnancy history and live birth history.  bModel 2 was additionally adjusted for depressive symptoms based on Model 1.  * *P*＜0.05, ** *P*＜0.01. | | | |
