# Supplementary material
Source: Research Square preprint supplement (doi:10.21203/rs.3.rs-8596518/v1)
Supplement: Supplementary file 3 [file d5c329e7374e229e9e27a5ce.doc]

**Data Sharing Statement**

**Data**

**Data available:** No

**Additional Information**

**Explanation for why data not available:** Data are available upon request to the corresponding author. Unrestricted data sharing is not allowed due to ethical consent and privacy restrictions.
